# Supplementary material for: ‘Stressed, uncomfortable, vulnerable, neglected’: a qualitative study of the psychological and social impact of the COVID-19 pandemic on UK frontline keyworkers
Source: PubMed Central journal article supplement (PMC8593269; doi:10.1136/bmjopen-2021-050945), 2021-11-12
Supplement: bmjopen-2021-050945.draft_revisions.pdf [file bmjopen-2021-050945.draft_revisions.pdf]

# BMJ Open

BMJ Open is committed to open peer review. As part of this commitment we make the peer review history of every article we publish publicly available.

When an article is published we post the peer reviewers' comments and the authors' responses online. We also post the versions of the paper that were used during peer review. These are the versions that the peer review comments apply to.

The versions of the paper that follow are the versions that were submitted during the peer review process. They are not the versions of record or the final published versions. They should not be cited or distributed as the published version of this manuscript.

BMJ Open is an open access journal and the full, final, typeset and author-corrected version of record of the manuscript is available on our site with no access controls, subscription charges or pay-per-view fees (<http://bmjopen.bmj.com>).

If you have any questions on BMJ Open's open peer review process please email [info.bmjopen@bmj.com](mailto:info.bmjopen@bmj.com)

# BMJ Open

**'Stressed, uncomfortable, vulnerable, neglected': a qualitative study of the psychological and social impact of the COVID-19 pandemic on UK frontline keyworkers.**

|                               |                                                                                                                                                                                                                                                                                                                                                                                                                                                                                                                                                                                                              |
|-------------------------------|--------------------------------------------------------------------------------------------------------------------------------------------------------------------------------------------------------------------------------------------------------------------------------------------------------------------------------------------------------------------------------------------------------------------------------------------------------------------------------------------------------------------------------------------------------------------------------------------------------------|
| Journal:                      | <i>BMJ Open</i>                                                                                                                                                                                                                                                                                                                                                                                                                                                                                                                                                                                              |
| Manuscript ID                 | bmjopen-2021-050945                                                                                                                                                                                                                                                                                                                                                                                                                                                                                                                                                                                          |
| Article Type:                 | Original research                                                                                                                                                                                                                                                                                                                                                                                                                                                                                                                                                                                            |
| Date Submitted by the Author: | 04-Mar-2021                                                                                                                                                                                                                                                                                                                                                                                                                                                                                                                                                                                                  |
| Complete List of Authors:     | <p>May, Tom; University College London, Research Department of Behavioural Science and Health, Institute of Epidemiology and Health Care</p> <p>Aughterson, Henry; University College London, Research Department of Behavioural Science and Health, Institute of Epidemiology and Health Care</p> <p>Fancourt, Daisy; University College London, Research Department of Behavioural Science and Health, Institute of Epidemiology and Health Care</p> <p>Burton, Alexandra; University College London, Research Department of Behavioural Science and Health, Institute of Epidemiology and Health Care</p> |
| Keywords:                     | COVID-19, MENTAL HEALTH, OCCUPATIONAL & INDUSTRIAL MEDICINE, QUALITATIVE RESEARCH                                                                                                                                                                                                                                                                                                                                                                                                                                                                                                                            |
|                               |                                                                                                                                                                                                                                                                                                                                                                                                                                                                                                                                                                                                              |

SCHOLARONE™  
Manuscripts

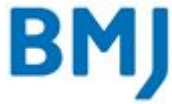

I, the Submitting Author has the right to grant and does grant on behalf of all authors of the Work (as defined in the below author licence), an exclusive licence and/or a non-exclusive licence for contributions from authors who are: i) UK Crown employees; ii) where BMJ has agreed a CC-BY licence shall apply, and/or iii) in accordance with the terms applicable for US Federal Government officers or employees acting as part of their official duties; on a worldwide, perpetual, irrevocable, royalty-free basis to BMJ Publishing Group Ltd ("BMJ") its licensees and where the relevant Journal is co-owned by BMJ to the co-owners of the Journal, to publish the Work in this journal and any other BMJ products and to exploit all rights, as set out in our [licence](#).

The Submitting Author accepts and understands that any supply made under these terms is made by BMJ to the Submitting Author unless you are acting as an employee on behalf of your employer or a postgraduate student of an affiliated institution which is paying any applicable article publishing charge ("APC") for Open Access articles. Where the Submitting Author wishes to make the Work available on an Open Access basis (and intends to pay the relevant APC), the terms of reuse of such Open Access shall be governed by a Creative Commons licence – details of these licences and which [Creative Commons](#) licence will apply to this Work are set out in our licence referred to above.

Other than as permitted in any relevant BMJ Author's Self Archiving Policies, I confirm this Work has not been accepted for publication elsewhere, is not being considered for publication elsewhere and does not duplicate material already published. I confirm all authors consent to publication of this Work and authorise the granting of this licence.

1  
2  
3 **Title:** ‘Stressed, uncomfortable, vulnerable, neglected’: a qualitative study of the  
4 psychological and social impact of the COVID-19 pandemic on UK frontline keyworkers.  
5  
6

7 **Authors:** Tom May<sup>1\*</sup>, Henry Aughterson<sup>1</sup>, Daisy Fancourt<sup>1</sup>, Alexandra Burton<sup>1</sup>  
8  
9

10  
11  
12 <sup>1</sup>Research Department of Behavioural Science and Health  
13

14 Institute of Epidemiology & Health Care  
15

16 University College London  
17

18 1-19 Torrington Place  
19

20 London  
21

22 WC1E 7HB  
23  
24  
25  
26  
27

28 \* [t.may@ucl.ac.uk](mailto:t.may@ucl.ac.uk) (TM)  
29  
30  
31  
32  
33  
34  
35  
36  
37  
38  
39  
40  
41  
42  
43  
44  
45  
46  
47  
48  
49  
50  
51  
52  
53  
54  
55  
56  
57  
58  
59  
60

## Abstract:

**Objectives** Non-healthcare keyworkers face distinct occupational vulnerabilities that have received little consideration within broader debates about ‘essential’ work and psychological distress during the COVID-19 pandemic. The aim of this study was therefore to explore the impact of the pandemic on the working lives and mental health and wellbeing of non-healthcare keyworkers in the UK.

**Design** In-depth, qualitative interviews, analysed using a reflexive thematic analysis.

**Setting** Telephone or video call interviews, conducted in the UK between September 2020 and January 2021.

**Participants** 23 participants employed in a range of non-healthcare keyworker occupations, including transport, retail, education, postal services and the police force.

**Results** Keyworkers experienced adverse psychological effects during the COVID-19 pandemic, including fears of COVID-19 exposure, contagion and subsequent transmission to others, especially their families. These concerns were often experienced in the context of multiple exposure risks, including insufficient PPE and a lack of workplace mitigation practices. Keyworkers also described multiple work-related challenges, including increased workload, a lack of public and organisational recognition and feelings of disempowerment.

**Conclusions** In efforts to reduce psychosocial concerns among non-healthcare keyworkers, there is a need for appropriate support during the COVID-19 pandemic and in preparation for other infections (e.g. seasonal influenza) in the future. This includes the provision of psychological and workplace measures attending to the intersections of personal vulnerability and work conditions that cause unique risks and challenges among those in frontline keyworker occupations.

### Strengths and limitations of this study

- This is the first known qualitative study to interview a range of non-healthcare keyworkers about their experiences of working during the COVID-19 pandemic.
- Data were obtained through in-depth, qualitative interviews with a strong theoretical underpinning between September 2020 – January 2021, thereby complementing earlier quantitative research in this field.
- Findings can inform the development of psychosocial and occupational support for non-healthcare keyworkers, both as COVID-19 persists and in future scenarios.
- Study may be limited by a sample biased toward those motivated or willing to participate.
- Data covers a range of keyworker occupations, which, whilst useful in terms of coverage, may limit specificity.

## Introduction

In response to the COVID-19 pandemic, restrictions of varying stringency have been imposed by governments around the world to suppress the virus. In the UK, mitigation measures including self-isolation, mobility constraints and the closure of all but essential workplaces have been implemented in efforts to minimise contact and transmission<sup>1</sup>. Whilst some occupational groups have navigated these measures through flexible working practices (e.g. home working) and economic support (e.g. ‘furlough’), those employed in ‘essential’ keyworker occupations, including healthcare, transport and education among others, were mostly exempt from such strategies<sup>2</sup>. Consequently, many frontline keyworkers have continued to work throughout the pandemic, often at increased risk of exposure to and acquisition of COVID-19<sup>3-5</sup>.

The psychological demands of working through the COVID-19 pandemic have attracted a substantial amount of academic interest. However, to date, research has primarily focused on the experiences of health and social care workers (HCWs)<sup>6-12</sup>. These studies have documented elevated levels of stress<sup>11</sup>, anxiety<sup>10</sup> and depression<sup>9</sup> through increased workloads, changing work conditions, and feelings of helplessness<sup>6-12</sup>. HCWs have also endured longer working hours with inadequate personal protective equipment (PPE)<sup>7</sup>, and have reported fears of infection for themselves and their families<sup>8 12</sup>. There is evidence that previous epidemics (e.g., SARS and MERS) posed similar work-related stressors and subsequent demands on the psychological wellbeing of those working in health and social care occupations<sup>13-15</sup>. Conversely, there is some evidence that HCWs may also experience positive outcomes from working throughout pandemics, including a renewed sense of purpose, contribution and reward<sup>8 12</sup>.

1  
2  
3 Research investigating the experiences of non-health keyworkers (hereafter ‘keyworkers’)  
4 such as those employed in transport, retail, education and various other public services is  
5 limited<sup>4</sup>. Nevertheless, similar to HCWs, emerging data suggests that these keyworkers are  
6 experiencing elevated stress and anxiety during the pandemic. A recent publication on  
7 grocery store workers in the United States found increased anxiety and depression among  
8 employees with direct exposure to customers (e.g. cashiers)<sup>4</sup>. Correspondingly, a case study  
9 of a single UK supermarket employee described how customer behaviours, inadequate PPE  
10 and the absence of workplace mitigation policies induced fears of COVID-19 transmission<sup>5</sup>.  
11  
12  
13  
14  
15  
16  
17  
18  
19  
20  
21  
22  
23

24 Despite these similarities, many keyworkers face distinct occupational vulnerabilities that  
25 have received little consideration within broader debates about essential work and  
26 psychological distress during the pandemic. First, there is evidence that some keyworkers  
27 (e.g. transport workers) have increased vulnerability to COVID-19 due to age, pre-existing  
28 health conditions, ethnicity and area of residence<sup>3</sup>. Being at increased risk of COVID-19  
29 susceptibility is likely to have a detrimental impact on mental health and wellbeing due to the  
30 perceived negative consequences of infection, as documented in studies with older adults<sup>16</sup>  
31 and those with long-term health conditions<sup>17</sup>. Second, many keyworkers, particularly those  
32 from low-income, service, or elementary occupations, may face financial challenges that  
33 increase susceptibility to COVID-19<sup>2</sup>. Although the Coronavirus Act 2020 extended  
34 Statutory Sick Pay (SSP) to all UK employees, the scheme is based on contractual hours.  
35 Part-time employees, or those reliant on overtime, may therefore be unwilling to take leave or  
36 self-isolate due to substantial reductions in wages<sup>2,5</sup>. Alternatively, some keyworkers may  
37 face financial hardship if they choose to or are required to self-isolate, which may induce  
38 mental distress<sup>18,19</sup>.  
39  
40  
41  
42  
43  
44  
45  
46  
47  
48  
49  
50  
51  
52  
53  
54  
55  
56  
57  
58  
59  
60



1  
2  
3 Accordingly, there is a need for in-depth data on keyworkers' experiences during the  
4  
5 pandemic to aid our understanding of specific work-related stressors and to inform future  
6  
7 psychosocial support for this group as the COVID-19 pandemic persists, and, in preparation  
8  
9 for other infections (e.g. seasonal influenza). To these ends, the study aimed to explore  
10  
11 qualitatively the impact of the COVID-19 pandemic on the working lives and mental health  
12  
13 and wellbeing of UK frontline keyworkers.  
14  
15  
16  
17  
18  
19  
20  
21  
22  
23  
24  
25  
26  
27  
28  
29  
30  
31  
32  
33  
34  
35  
36  
37  
38  
39  
40  
41  
42  
43  
44  
45  
46  
47  
48  
49  
50  
51  
52  
53  
54  
55  
56  
57  
58  
59  
60

For peer review only

## Methods

The research employed a qualitative design using semi-structured interviews with UK keyworkers. The study formed part of the UCL COVID-19 Social Study<sup>20</sup>, which explores the psychosocial effects of COVID-19 and associated restrictions on adults in the UK.

Participants were interviewed between September 2020 – January 2021 about their working experiences throughout the pandemic, including any implications for mental health and wellbeing. Ethical approval was provided by University College London research ethics committee [Project ID 14895/005].

## Sample and recruitment

Eligibility was based primarily on whether the person was a non-healthcare keyworker (as defined by UK Government criteria<sup>21</sup>), aged over 18, working during the pandemic, and living in the UK. Participants were purposively recruited to ensure diversity of gender, age, and occupation via social media, personal contacts and the UCL COVID-19 Social Study newsletter and website. Participants were provided with both verbal and written information about the purpose of the research, and informed that their involvement was voluntary. All participants signed a consent form to indicate their agreement to participate, and provided demographic information.

## Data collection

Interviews were conducted by TM (research fellow in social science), RC (research fellow in public health) and SE (research assistant) via telephone or video call. All interviewers were

1  
2  
3 experienced qualitative health researchers educated to at least postgraduate level. Interviews  
4 followed a topic guide that posed questions about the participant's experience(s) of the  
5 impact of the pandemic on work, social life and mental health and wellbeing. Interviews  
6 lasted an average of 45 minutes, and were digitally recorded and transcribed verbatim by a  
7 professional transcription service. Participants were offered compensation in the form of a  
8 £10 high street e-voucher. Data collection continued up until the point at which instances of  
9 data emerged consistently, or where no further data would develop new properties, categories  
10 or findings (i.e. theoretical saturation)<sup>22</sup> .  
11  
12  
13  
14  
15  
16  
17  
18  
19  
20  
21  
22

### 23 Patient and Public Involvement

24  
25  
26  
27 Participants or members of the public were not involved in the design, conduct or reporting of  
28 the study, nor the dissemination of findings. Participants will be provided with study result  
29 upon request, however. The findings will also be disseminated to the public through social  
30 media and newsletters (e.g., March Network).  
31  
32  
33  
34  
35  
36  
37  
38

### 39 Data analysis

40  
41  
42  
43 Following anonymisation by the lead researcher (TM), transcripts were uploaded to NVivo  
44 version 12 software for analysis. Analysis began with researchers familiarising themselves  
45 with data by reading through the individual transcripts. Following this, three transcripts were  
46 initially read independently by two researchers (TM and HA), who coded and discussed any  
47 emerging codes of potential significance to the research objective. A preliminary coding  
48 framework, informed deductively by concepts within the topic guide, was used to guide this  
49 process, although an inductive approach was also used to refine the framework in  
50 correspondence with any emerging concepts within the data. This was then applied to the  
51  
52  
53  
54  
55  
56  
57  
58  
59  
60

1  
2  
3 remaining transcripts by TM, who re-read transcripts and coded and synthesised text into  
4  
5 categories, which were subsequently analysed and grouped into themes<sup>23</sup>. To ensure that the  
6  
7 final extracted themes were not just the personal interpretation of one team member, the  
8  
9 qualitative research team met weekly to discuss and iteratively refine any new codes or  
10  
11 themes that emerged.  
12  
13  
14  
15  
16  
17  
18  
19  
20  
21  
22  
23  
24  
25  
26  
27  
28  
29  
30  
31  
32  
33  
34  
35  
36  
37  
38  
39  
40  
41  
42  
43  
44  
45  
46  
47  
48  
49  
50  
51  
52  
53  
54  
55  
56  
57  
58  
59  
60

For peer review only

## Findings

Twenty-three keyworkers were interviewed. Participants were aged 26-61, predominantly male (61%) and White British (70%).

**Table 1: Characteristics of participants**

|                               |                                                                                                                                                                                                                                                                                                                                                                         |
|-------------------------------|-------------------------------------------------------------------------------------------------------------------------------------------------------------------------------------------------------------------------------------------------------------------------------------------------------------------------------------------------------------------------|
| <b>Number of participants</b> | <b>23</b>                                                                                                                                                                                                                                                                                                                                                               |
| <b>Profession</b>             | Bank worker (1)<br>Bus driver (6)<br>Bus depot supervisor (1)<br>Delivery driver (1)<br>Education staff (deputy head, primary school teacher, teaching assistant) (3)<br>Firefighter (1)<br>Platform staff (1)<br>Police staff (firearms officer, inspector, sergeant) (3)<br>Postal worker (1)<br>Religious staff (2)<br>Supermarket worker (2)<br>Waste operative (1) |
| <b>Age</b>                    | 26-61 (47.2)                                                                                                                                                                                                                                                                                                                                                            |
| <b>Gender</b>                 | Male (14)<br>Female (9)                                                                                                                                                                                                                                                                                                                                                 |
| <b>Ethnicity</b>              | Bangladeshi (1)<br>Black Other (1)<br>Indian (1)<br>White British (16)<br>White Other (3)<br>Other (British Turkish) (1)                                                                                                                                                                                                                                                |

Two primary themes were identified: (1) Perceptions of personal vulnerability and (2) Work-related challenges. These are shown in Figure 1, along with their respective subthemes.

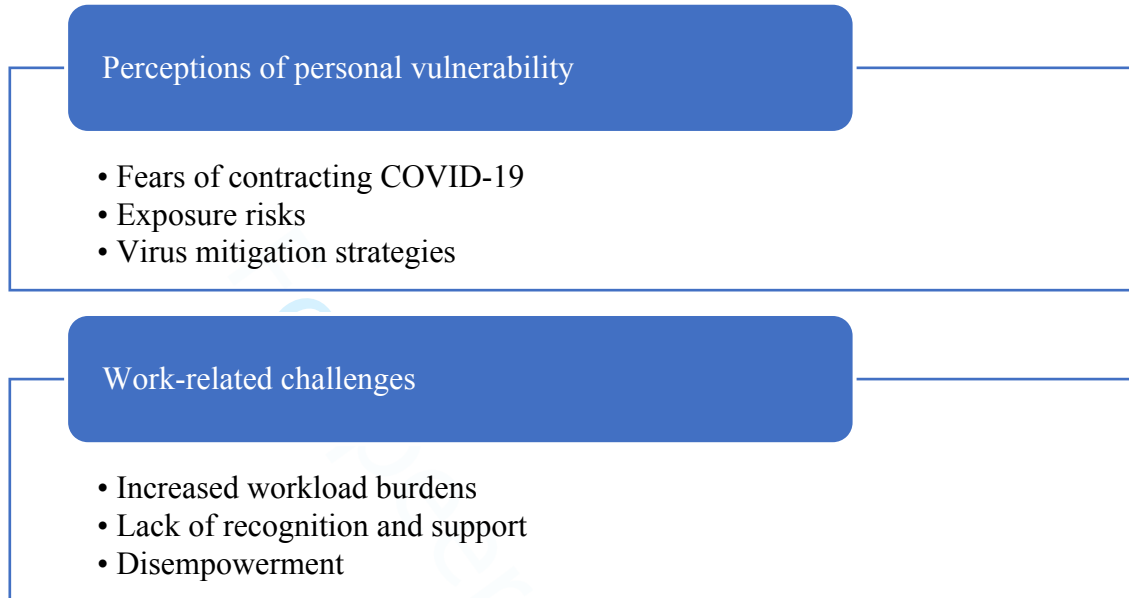

**Figure 1. Key themes**

### (1) Perceptions of personal vulnerability

#### Fears of contracting COVID-19

The majority of participants relayed fears of contracting COVID-19 whilst at work. Some had underlying health conditions that heightened these anxieties:

*'I was probably more worried than some are, that I might be more prone to catching it. Because I've got asthma, I've got chronic sinusitis, and I just thought, if this is a respiratory thing, you're buggered' (supermarket worker 1)*

1  
2  
3 Others were less fearful of the implications for themselves but expressed concerns about  
4 becoming a source of transmission. Some lived in households with vulnerable family  
5 members, including elderly parents and children with underlying health conditions (*'because*  
6 *of my personal circumstances at home, I had two people in their 70s and an asthmatic child.*  
7 *The stress and worry and fear of me basically bringing that home to them was just crippling*  
8 *me', supermarket worker 2), whilst others were more concerned about contracting and*  
9 *transmitting the virus to vulnerable members of the public ('I also don't want to give it to*  
10 *anyone else. I might see someone who's vulnerable, so I'm conscious that it's not me I've got*  
11 *to worry about, it's everyone else', police staff). Working in environments that posed*  
12 *significant risks to themselves and others was, therefore, a source of anxiety:*

13  
14  
15  
16  
17  
18  
19  
20  
21  
22  
23  
24  
25  
26  
27  
28  
29  
30  
31  
32  
33  
34  
35  
36  
37  
38  
39  
40  
41  
42  
43  
44  
45  
46  
47  
48  
49  
50  
51  
52  
53  
54  
55  
56  
57  
58  
59  
60  
*'I was so anxious about going to work with the coronavirus. I was quite*  
*paranoid. I used to dread leaving the house every day, going into work. It*  
*was really, really hard' (bus driver 1)*

## Exposure risks

Participants noted specific exposure risks at work that prompted fears of contracting COVID-19. Some reported governmental and organisational delays in initiating and implementing protective actions, including workplace instructions aimed at mitigating transmission. As a result, many continued to work without organisational guidance during the initial stages of the pandemic, which prompted feelings of vulnerability:

*'So, that first week was really important to me, because we weren't really*  
*protected. We didn't know what the crack was about face masks....we were*

1  
2  
3 *driving around in buses for that week that didn't have protection, what we*  
4 *call an assault screen, you know, something that separates you from the*  
5 *passengers on the bus...and we were thinking, jeez guys, anything could be*  
6 *going on here' (bus driver 2)*  
7  
8  
9  
10  
11  
12  
13  
14

15 Similarly, most participants reported the inadequate provision of workplace PPE. Some noted  
16 initial delays in receiving equipment through their employer (*'hand sanitiser came in, I think,*  
17 *probably three, four weeks after lockdown started', bus driver 3*), whilst others described  
18 limited (*'sometimes we don't even have soap in the bathrooms', delivery driver*) or no  
19 supplies (*'we weren't given any kind of PPE. Nothing was offered', supermarket worker 2*).  
20 In some workplaces, such as on buses and in supermarkets, other protective measures  
21 including daily antiviral cleaning and enhanced sanitation were often inadequate:  
22  
23  
24  
25  
26  
27  
28  
29  
30  
31  
32  
33

34 *'There are aspects of it that worry me. I don't think in some ways [the*  
35 *supermarket] is the most hygienic place in the world' (supermarket worker*  
36 *1)*  
37  
38  
39  
40  
41  
42  
43

44 Working closely with the public was an additional concern among some keyworkers. Some  
45 noted how some members of the public did not always conform with social distancing  
46 guidelines or the wearing of PPE (*'there are people not getting on with masks when they*  
47 *should, or if they are wearing one they are wearing one under their chin. I would say 80% of*  
48 *people are being compliant, but then you've got 20% of people who don't give a monkeys',*  
49 *bus driver 4*). Others reported how the public would also, at times, behave inappropriately  
50 around staff. This was often frightening for participants:  
51  
52  
53  
54  
55  
56  
57  
58  
59  
60



1  
2  
3  
4  
5  
6 *'I mean, we did initially have some young lads come in who were actually*  
7 *deliberately coughing and sneezing, both on colleagues and other*  
8 *customers. And it really freaked a lot of people out because people were*  
9 *genuinely in fear'*(supermarket worker 2)  
10  
11  
12  
13  
14  
15  
16  
17  
18

19 Relatedly, some keyworkers worked in confined spaces that were un conducive to social  
20 distancing (*'social distance is quite hard at the depot to do', delivery driver*), or worked with  
21 colleagues who did not follow social distancing rules. The inability to properly socially  
22 distance elevated fears of potential exposure:  
23  
24  
25  
26  
27  
28  
29  
30

31 *'I don't feel very safe...because many, many drivers arrive and they meet*  
32 *with other people as well and I don't know where they are or who they are*  
33 *...a few of them was coughing...and they said, oh it's just a cold. But you*  
34 *think it's a cold but how I supposed to know that it's not' (delivery driver)*  
35  
36  
37  
38  
39  
40  
41  
42  
43

#### 44 Virus mitigation strategies

45  
46  
47

48 To mitigate concerns about contracting and transmitting the virus, participants often enacted  
49 their own mitigation strategies. Some reported purchasing and wearing their own PPE (*'I got*  
50 *my face mask, I got a cloth one...I have started wearing a hoodie as well, just to cover me*  
51 *whole', bus driver 6*) and sanitising their workspace (*'I took my own bleach solution and*  
52 *soapy water solution and was cleaning everything in the cab...we were all bringing our own*  
53  
54  
55  
56  
57  
58  
59  
60

1  
2  
3 *stuff in...just to be safe', bus driver 4).* Such measures were acted out in the absence of  
4  
5 inadequate PPE provision:  
6  
7  
8  
9

10  
11 *'There was no hand sanitisers. There was nothing. Absolutely zero. Even*  
12  
13 *during lockdown, for the first part of it, there was nothing at all. It was*  
14  
15 *down to the drivers' (bus driver 4)*  
16  
17  
18  
19

20  
21 Whilst these measures enabled participants to psychologically cope with stressful working  
22  
23 conditions, they did not always prevent family members or loved ones from feeling anxious  
24  
25 about possible transmission. To reduce these concerns, some keyworkers would therefore  
26  
27 'decontaminate' upon re-entering their home:  
28  
29  
30  
31

32  
33 *'So when I come from school, I literally strip off at the door. Everything*  
34  
35 *goes into a bag, everything gets cleaned off. I don't talk to anyone or touch*  
36  
37 *anyone. I don't go near anyone until I've decontaminated' (teacher 1).*  
38  
39  
40  
41  
42

43 Others temporarily separated from anxious loved ones by either sleeping in separate  
44  
45 bedrooms (*'[husband] went in the spare room, so he kind of lived in the spare room for a*  
46  
47 *long time, so that we were distanced', supermarket worker 1)* or moving out of their home.  
48  
49 One bus driver, for example, moved to rented accommodation to protect his wife from the  
50  
51 risk of infection. Such measures, whilst deemed necessary, induced additional psychosocial  
52  
53 strains among keyworkers, including loneliness and isolation:  
54  
55  
56  
57  
58  
59  
60

1  
2  
3 *'[I feel] Very lonely...I've been with [wife] since 1990. We've always been*  
4 *together, always done things together and to suddenly be sitting in a room*  
5 *on your own is quite dire. It upset me at first. I cried myself to sleep for a*  
6 *few nights, you can't believe this is happening' (bus driver 4)*  
7  
8  
9  
10  
11  
12  
13  
14  
15

## 16 (2) Work-related challenges

### 17 Increased workload burdens

18  
19  
20 The pandemic presented several work-related disruptions and challenges. Staff who were  
21  
22  
23  
24  
25  
26  
27  
28  
29  
30  
31  
32  
33  
34  
35  
36  
37  
38  
39  
40  
41  
42  
43  
44  
45  
46  
47  
48  
49  
50  
51  
52  
53  
54  
55  
56  
57  
58  
59  
60  
The pandemic presented several work-related disruptions and challenges. Staff who were  
infected with COVID-19 or had been in close contact with a case were required to self-  
isolate. This often resulted in staff shortages:

*'During lockdown, we were decimated with staff. We were absolutely on  
our backside...so, I was actually out on weekends, on Saturdays, driving  
vehicles supporting the operation leaders. We didn't have enough staff'*  
*(waste operative)*

Insufficient staff numbers resulted in increased workloads and longer hours, often without  
extra pay (*'we're doing more hours. They increased the length of the shift. We're on a salary.  
We're not hourly-paid so obviously, when we were due to do a shorter shift we would still get  
a long one', bus driver 4*). Some participants were also required to perform additional or new  
duties to relieve workload burdens, which were an additional source of stress:

1  
2  
3                   *'We're totally doing jobs that we never did before, because we're*  
4                   *answering the telephone calls, because our call centre is in India, and*  
5                   *they're on total lockdown...so, that part I find stressful' (bank worker)*  
6  
7  
8  
9

10  
11  
12  
13 The stress of increased workload burdens and carrying out new tasks beyond usual levels of  
14 expertise would, at times, lead to tension and conflict within the workplace:  
15  
16

17  
18  
19  
20  
21                   *'A lot of friction, people just snapping at each other over the slightest*  
22                   *thing. It would just set people off. A couple of times, I had to intervene.*  
23                   *Guys, calm down. Jesus, boys. What are you doing?...behave yourself...I*  
24                   *was having to stop people pulling lumps out of each other' (waste*  
25                   *operative)*  
26  
27  
28  
29  
30  
31  
32  
33  
34

35 Additionally, those who transitioned to online working (including police, teachers and bank  
36 workers) welcomed such changes, but noted difficulties. Tasks that were previously  
37 performed with ease proved more challenging when working from home (e.g. communicating  
38 with colleagues). Some also reported being 'overloaded' with virtual meetings:  
39  
40  
41  
42  
43  
44  
45  
46  
47

48                   *'Because it's virtual and I chaired a meeting the other day and I said, look,*  
49                   *I need to eat, I need to get up. Because what you don't see is, we have a*  
50                   *meeting here now, and then say yes, bye, and then I'm straight into another*  
51                   *one...so I think there's been a huge overload' (police staff 2)*  
52  
53  
54  
55  
56  
57  
58  
59  
60

### Lack of recognition and support

Although some participants were appreciative of the support they received from the public, some felt undervalued, particularly in comparison to NHS health care workers whose work was recognised regularly in public gestures of appreciation (e.g., clap for carers):

*‘They deserve the respect they get, the NHS people, and they should. But I think a lot of people forgot about there's people out there like myself on the railway, bus drivers as well. And there's been really, not much for people, like myself, in the frontline’ (platform staff)*

Internal recognition (i.e. from management) was also limited (*‘Internally, from management...I don't think the recognition has been as wide as it could or should be’, waste operative*). In particular, keyworkers felt that the risks they were exposed to were not fully acknowledged or appreciated (*‘I felt stressed. I felt uncomfortable. I felt vulnerable. I felt neglected. I felt everything because the company still don't think it's serious’, bus driver 5*).

Some felt that profit was sometimes prioritised over staff safety:

*“Management don't give a crap about staff. They just care about the things that goes in the till, which is the money. And they don't want to pay sick pay. There was another one...his wife was a teacher and she was told to self-isolate. So obviously, he should have been self-isolating, because there was an outbreak at the school. He was told by the manager of the store just to come in, it wasn't a problem” (supermarket worker 2)*

## Disempowerment

Despite concerns about contracting COVID-19, many participants felt that they had to work for fear of financial implications or punitive measures. Some were concerned that protracted absences would result in disciplinary action (*'But the particular academy chain that I work for has said that if teachers are not available to work from day one when they come back, then it will be disciplinary', teacher 1*) or job loss:

*'People were genuinely scared because the government was saying this and your manager's going, no, you do this or you don't have a job...you can't afford not to be there or to lose hours or to lose your job' (supermarket worker 2)*

Participants reported opportunities to take furlough or sick leave but noted the financial implications of doing so. For example, some participants (particularly supermarket workers, bus drivers and police staff) relied on overtime to supplement their income. However, additional hours are not accounted for in SSP or furlough schemes. Any absence would subsequently result in financial hardship:

*'I worked all the way through since the beginning. I was given the choice of furlough, but I turned it down...it would have been such a drop in money, it would have put a financial hardship on us' (bus depot supervisor)*

1  
2  
3 In this context, many keyworkers recognised that they had no option but to continue working  
4  
5 (*I just thought, well, I either stay at home and do nothing and go unemployed, or I carry on*  
6  
7 *working. And that was literally my two options. There was no middle*, bus driver 3). Some  
8  
9 reported feeling powerless, and resigned themselves to the possibility of contracting COVID-  
10  
11  
12 19:

13  
14  
15  
16  
17  
18 *'And in my line of work, being on the frontline, there's probably a high*  
19  
20 *chance that I am going to probably get it at some point. And you just resign*  
21  
22 *yourself to the fact'* (platform staff)  
23  
24  
25  
26  
27  
28  
29  
30  
31  
32  
33  
34  
35  
36  
37  
38  
39  
40  
41  
42  
43  
44  
45  
46  
47  
48  
49  
50  
51  
52  
53  
54  
55  
56  
57  
58  
59  
60

## Discussion

The findings presented in this paper are particularly valuable as, to date, non-healthcare keyworker voices are largely absent within broader debates about ‘essential’ work and psychological distress during the COVID-19 pandemic<sup>4</sup>. Therefore, this study provides new insights into the psychological impact of frontline work during the COVID-19 pandemic, including how non-healthcare keyworkers respond to and experience previously identified occupational risks, including insufficient PPE<sup>2</sup> and the inability to socially distance<sup>4</sup>.

By far the most prevalent stressor was the fear of contracting COVID-19. Those who continued to work close to others or in environments un conducive to social distancing reported feelings of exposure and vulnerability. Consistent with research with HCWs, feeling unsafe and vulnerable to infection are predictive of poor mental health. Frontline HCWs, for example, were more likely to experience greater psychosocial distress during the COVID-19 pandemic and previous outbreaks because they were likely to have the most direct patient contact<sup>12 24 25</sup>. This is not dissimilar from recent data documenting elevated psychological distress among supermarket workers unable to socially distance at work during the COVID-19 pandemic<sup>4 5</sup>. Although it appears a similar awareness of one’s vulnerability increased feelings of anxiety among our sample, our findings highlight additional occupational factors and working conditions that compounded fears of contagion, including the inadequate provision of PPE and organisational delays in initiating and implementing protective actions aimed at mitigating transmission.

In response to these risks, many participants enacted their own risk reduction practices, including purchasing PPE, sanitising their workplaces and temporary separation from family members. Whilst such measures helped reduce feelings of exposure, they also reinforce



1  
2  
3 widespread concerns from keyworkers and public health officials regarding the inadequacy of  
4 PPE provision for those in frontline occupations during the pandemic<sup>2 26</sup>. This is potentially  
5 concerning for the wellbeing of keyworkers, given that previous research has highlighted  
6 how precautionary workplace measures, including sufficient PPE and infection control  
7 measures, are associated with decreased levels of concern and emotional exhaustion among  
8 HCWs<sup>24 27</sup>. The provision of protective measures by employees is also likely to reduce the  
9 need to enact mitigation strategies (e.g. temporary separation) that may trigger additional  
10 psychosocial burdens (e.g. loneliness, isolation<sup>10</sup>).  
11  
12  
13  
14  
15  
16  
17  
18  
19  
20  
21  
22

23  
24 Workplace challenges also posed several additional stressors. Increased workloads were  
25 common and led to elevated feelings of stress and subsequent workplace tension and conflict.  
26  
27 Workplace unity has been found to be an important source of support and resilience among  
28 HCWs during the COVID-19<sup>10 12</sup> and previous pandemics<sup>15 28</sup>, however, this protective factor  
29 was not experienced by keyworkers in our study. Similarly, whilst HCWs may experience  
30 comparable workload challenges, these are often endured alongside enhanced public and  
31 organisational recognition for their efforts (e.g. clap for carers). Among HCWs, greater  
32 recognition - both publicly and organisationally - has been shown to produce protective  
33 mechanisms linked to resilience, including a renewed sense of purpose, contribution and  
34 reward<sup>8 12</sup>. The absence of similar public and organisational appreciation limited the  
35 emergence of any 'positive' psychosocial effects occurring among those in our study. Hence,  
36 many keyworkers experienced workplace challenges in the absence of protective and support  
37 mechanisms proven beneficial to other occupational groups.  
38  
39  
40  
41  
42  
43  
44  
45  
46  
47  
48  
49  
50  
51  
52  
53  
54  
55

56 Many participants reported feeling powerless to the situation. This was primarily due to fears  
57 of financial hardship or disciplinary action. Indeed, there is evidence that some keyworkers,  
58  
59  
60

1  
2  
3 particularly those part-time or heavily reliant on overtime, may be unwilling to take leave or  
4 self-isolate due to substantial reductions in wages<sup>5</sup>. Many participants reported similar  
5 concerns and that they had no option but to continue working, despite concerns about  
6 possible infection. Conversely, those who did take leave, whether through SSP or furlough,  
7 reported income losses. This is a particular concern given how COVID-19 induced economic  
8 hardship is having adverse effects on the psychological wellbeing of the population<sup>29 30</sup>.  
9

10  
11 These findings should be considered in light of a number of limitations. First, while this study  
12 provides unique and important insights into keyworkers' experiences during the pandemic,  
13 the timing of the interviews may need to be considered when interpreting the findings. The  
14 majority of interviews were conducted between September and November 2020. Whilst this  
15 meant that participants were able to recount both current and retrospective experiences during  
16 periods of lockdown and more relaxed measures, as the pandemic is ongoing, experiences are  
17 still evolving. Second, this study may be limited by a sample biased toward those motivated  
18 or willing to participate. There is the potential that the views and experiences of those unable  
19 or unwilling to participate may differ from those in this study (e.g. unaffected by working  
20 conditions) and have therefore not been documented. Finally, our data covers a range of  
21 keyworker occupations, which, whilst useful in terms of coverage, may limit specificity.  
22

23  
24 Where possible, we have attempted to draw out any distinctions between occupations in the  
25 data.  
26  
27

28  
29 Our study has some important implications for policy and organisational practices. First, our  
30 findings suggest that sufficient protective measures in workplaces are urgently required, as  
31 many participants reported feeling exposed and unsafe. The inadequacy of governmental and  
32 organisational responses to the pandemic is highlighted by the fact that some enacted their  
33 own mitigation practices to prevent exposure to and acquisition of COVID-19. Hence, the  
34  
35  
36  
37  
38  
39  
40  
41  
42  
43  
44  
45  
46  
47  
48  
49  
50  
51  
52  
53  
54  
55  
56  
57  
58  
59  
60

1  
2  
3 provision of adequate PPE, strategies aimed at reducing interpersonal contact (including  
4 temporary accommodation, as has been provided for some HCWs<sup>31</sup>), and repeat and routine  
5 employee testing are but a number of measures that should be pursued to safeguard  
6  
7  
8  
9  
10 keyworkers who continue to operate on the frontline<sup>2</sup>. For keyworkers who are most at risk,  
11  
12 an increased range of actions is needed to protect them from exposure, given that the most  
13  
14 vulnerable workers (whether due to underlying condition, age, ethnicity or financial situation)  
15 reported the greatest concerns regarding work-related stressors. Second, adequate and  
16  
17 accessible financial support must be provided to safeguard keyworkers' health during this  
18  
19 pandemic and beyond. This is especially important for those keyworkers, who, due to the  
20  
21 nature of their job, are unable to access furlough schemes or sick pay because of worries  
22  
23 about financial loss<sup>32 33</sup>. Third, learning from the experiences of keyworkers in other  
24  
25 occupations (e.g. HCWs) may assist with planning interventions designed to assist resilience  
26  
27 in pandemics. Some HCWs have noted the importance of public recognition and social  
28  
29 support in minimising the psychological impact of the COVID-19 pandemic<sup>12</sup> and other  
30  
31 infectious disease outbreaks<sup>24</sup>. Our data suggest a need to provide similar recognition for  
32  
33 those working in occupations detailed in this study to buffer negative psychological  
34  
35 consequences. Finally, while these measures may help mitigate the immediate psychological  
36  
37 effects of the pandemic, it is worth noting that many of the psychological demands  
38  
39 experienced by keyworkers and highlighted in this article existed well before the advent of  
40  
41 COVID-19, including occupational stress<sup>34-36</sup>, low levels of job satisfaction<sup>35 37</sup> and  
42  
43 burnout<sup>38</sup>. Hence, although support for keyworkers is needed now more than ever, workplace  
44  
45 support packages must be provided beyond this period to address long-standing problems for  
46  
47 those employed in keyworker occupations.  
48  
49  
50  
51  
52  
53  
54  
55  
56  
57  
58  
59  
60

## Conclusion

This study highlights the psychological impact of the COVID-19 pandemic on those employed in frontline keyworker occupations in the UK. Participants reported anxiety about COVID-19 exposure and transmission to others, especially their families. These fears were often endured in the context of multiple exposure risks, including insufficient PPE and workplace support. Keyworkers also experienced work-related challenges, including increased workloads, a lack of recognition, and a sense of helplessness. This study therefore contributes to understandings of how the intersections of personal vulnerability and work conditions produce unique risks and challenges among those in frontline occupations. It is hoped that by recognising the voices of those who do not feel adequately supported, protected or valued for their work may be an initial step in understanding the psychosocial and occupational support non-healthcare keyworkers need, both as COVID-19 persists and in similar future scenarios.

### Word count

4446

### Acknowledgements

The authors would like to thank Dr Rana Conway and Sara Esser for their help with interviewing participants as part of this study, and Joanna Dawes, Dr Alison McKinlay, Dr Anna Roberts and Katey Warran for their assistance during the recruitment and analysis stages of this paper. The authors would also like to thank those people who gave up their time to take part and contribute to the study.

### Contributors

DF conceived the initial study and DF and AB contributed to the study design and ethical approval process. TM was responsible for data collection and was assisted by RC and SE during this stage. TM conducted formal analysis alongside HA, who coded three transcripts for cross-checking purposes. TM produced the original draft of the manuscript, which HA, AB and DF critically reviewed and edited. All authors (TM, HA, DF, AB) approved the final manuscript for submission.

### Ethical Approval

The study was reviewed and approved by the UCL Ethics Committee (Project ID 14895/005).

### Competing Interests

The author(s) declare no potential conflicts of interest with respect to the research, authorship and/or publication of this article.

### Funding statement

This COVID-19 Social Study was funded by the Nuffield Foundation [WEL/FR-000022583], but the views expressed here are those of the authors. The study was also supported by the MARCH Mental Health Network funded by the Cross-Disciplinary Mental Health Network Plus initiative supported by UK Research and Innovation [ES/S002588/1], and by the Wellcome Trust [221400/Z/20/Z]. DF was funded by the Wellcome Trust [205407/Z/16/Z].

### Data availability statement

The data are not publicly available due to their containing information that could compromise the privacy of research participants.

## References

1. Iacobucci G. Covid-19: UK lockdown is “crucial” to saving lives, say doctors and scientists. *BMJ* 2020;368:m1204. doi: 10.1136/bmj.m1204
2. The Lancet. The plight of essential workers during the COVID-19 pandemic. *The Lancet* 2020;395(10237):1587. doi: 10.1016/S0140-6736(20)31200-9
3. Goldblatt P, Morrison J. Initial assessment of London bus driver mortality from COVID-19. London: UCL Institute of Health Equity, 2020.
4. Lan F-Y, Suharlim C, Kales SN, et al. Association between SARS-CoV-2 infection, exposure risk and mental health among a cohort of essential retail workers in the USA. *Occupational and Environmental Medicine* 2020:oemed-2020-106774. doi: 10.1136/oemed-2020-106774
5. Cai M, Velu J, Tindal S, et al. ‘It’s Like a War Zone’: Jay’s Liminal Experience of Normal and Extreme Work in a UK Supermarket during the COVID-19 Pandemic. *Work, Employment and Society* 2020:0950017020966527. doi: 10.1177/0950017020966527
6. Vera San Juan N, Aceituno D, Djellouli N, et al. Mental health and well-being of healthcare workers during the COVID-19 pandemic in the UK: contrasting guidelines with experiences in practice. *BJPsych Open* 2021;7(1):e15. doi: 10.1192/bjo.2020.148 [published Online First: 2020/12/10]
7. Vindrola-Padros C, Andrews L, Dowrick A, et al. Perceptions and experiences of healthcare workers during the COVID-19 pandemic in the UK. *BMJ Open* 2020;10(11):e040503. doi: 10.1136/bmjopen-2020-040503
8. Liu Q, Luo D, Haase JE, et al. The experiences of health-care providers during the COVID-19 crisis in China: a qualitative study. *The Lancet Global Health* 2020;8(6):e790-e98. doi: 10.1016/S2214-109X(20)30204-7
9. Lai J, Ma S, Wang Y, et al. Factors Associated With Mental Health Outcomes Among Health Care Workers Exposed to Coronavirus Disease 2019. *JAMA Network Open* 2020;3(3):e203976-e76. doi: 10.1001/jamanetworkopen.2020.3976
10. Sun N, Wei L, Shi S, et al. A qualitative study on the psychological experience of caregivers of COVID-19 patients. *Am J Infect Control* 2020;48(6):592-98. doi: 10.1016/j.ajic.2020.03.018 [published Online First: 2020/04/08]
11. Kang L, Li Y, Hu S, et al. The mental health of medical workers in Wuhan, China dealing with the 2019 novel coronavirus. *Lancet Psychiatry* 2020;7(3):e14. doi: 10.1016/s2215-0366(20)30047-x [published Online First: 2020/02/09]
12. Aughterson H, McKinlay AR, Fancourt D, et al. Psychosocial impact on frontline health and social care professionals in the UK during the COVID-19 pandemic: a qualitative interview study. *BMJ Open* 2021;11(2):e047353. doi: 10.1136/bmjopen-2020-047353
13. McAlonan GM, Lee AM, Cheung V, et al. Immediate and sustained psychological impact of an emerging infectious disease outbreak on health care workers. *Can J Psychiatry* 2007;52(4):241-7. doi: 10.1177/070674370705200406 [published Online First: 2007/05/16]
14. Lee S-H, Juang Y-Y, Su Y-J, et al. Facing SARS: psychological impacts on SARS team nurses and psychiatric services in a Taiwan general hospital. *Gen Hosp Psychiatry* 2005;27(5):352-58. doi: 10.1016/j.genhosppsy.2005.04.007
15. Kim Y. Nurses' experiences of care for patients with Middle East respiratory syndrome-coronavirus in South Korea. *Am J Infect Control* 2018;46(7):781-87. doi: 10.1016/j.ajic.2018.01.012 [published Online First: 2018/03/01]
16. McKinlay A, Fancourt D, Burton A. “It makes you realise your own mortality.” A qualitative study on mental health of older adults in the UK during COVID-19. *medRxiv* 2020:2020.12.15.20248238. doi: 10.1101/2020.12.15.20248238
17. Fisher A, Roberts A, McKinlay AR, et al. The impact of the COVID-19 pandemic on mental health and well-being of people living with a long-term physical health condition: a qualitative study. *medRxiv* 2020:2020.12.03.20243246. doi: 10.1101/2020.12.03.20243246
18. Marmot M. Social determinants of health inequalities. *The Lancet* 2005;365(9464):1099-104. doi: 10.1016/S0140-6736(05)71146-6

19. Marmot M, Allen J, Bell R, et al. WHO European review of social determinants of health and the health divide. *The Lancet* 2012;380(9846):1011-29. doi: 10.1016/S0140-6736(12)61228-8
20. UCL. UCL Covid-19 Social Study 2021 [cited 2021 10th February]. Available from: <https://www.covidsocialstudy.org/> accessed 10th February 2021.
21. UK Government. Children of critical workers and vulnerable children who can access schools or educational settings London: Uk Government; 2021 [Available from: <https://www.gov.uk/government/publications/coronavirus-covid-19-maintaining-educational-provision/guidance-for-schools-colleges-and-local-authorities-on-maintaining-educational-provision> accessed 30th January 2021.
22. Strauss A. Qualitative analysis for social scientists. Cambridge, UK: Cambridge University Press 1999.
23. Braun V, Clarke V. Using thematic analysis in psychology. *Qualitative Research in Psychology* 2006;3(2):77-101. doi: 10.1191/1478088706qp063oa
24. Brooks SK, Dunn R, Amlôt R, et al. A Systematic, Thematic Review of Social and Occupational Factors Associated With Psychological Outcomes in Healthcare Employees During an Infectious Disease Outbreak. *J Occup Environ Med* 2018;60(3):248-57. doi: 10.1097/jom.0000000000001235 [published Online First: 2017/12/19]
25. Matsuishi K, Kawazoe A, Imai H, et al. Psychological impact of the pandemic (H1N1) 2009 on general hospital workers in Kobe. *Psychiatry Clin Neurosci* 2012;66(4):353-60. doi: 10.1111/j.1440-1819.2012.02336.x [published Online First: 2012/05/26]
26. BBC. Covid: Transport workers call for better protection after rise in deaths 2021 [Available from: <https://www.bbc.co.uk/news/uk-england-london-55623059> accessed 27th January 2021.
27. Marjanovic Z, Greenglass ER, Coffey S. The relevance of psychosocial variables and working conditions in predicting nurses' coping strategies during the SARS crisis: an online questionnaire survey. *Int J Nurs Stud* 2007;44(6):991-8. doi: 10.1016/j.ijnurstu.2006.02.012 [published Online First: 2006/04/19]
28. Tam CW, Pang EP, Lam LC, et al. Severe acute respiratory syndrome (SARS) in Hong Kong in 2003: stress and psychological impact among frontline healthcare workers. *Psychol Med* 2004;34(7):1197-204. doi: 10.1017/s0033291704002247 [published Online First: 2005/02/09]
29. Wright L, Steptoe A, Fancourt D. How are adversities during COVID-19 affecting mental health? Differential associations for worries and experiences and implications for policy. *medRxiv* 2020:2020.05.14.20101717. doi: 10.1101/2020.05.14.20101717
30. Witteveen D, Velthorst E. Economic hardship and mental health complaints during COVID-19. *Proc Natl Acad Sci U S A* 2020;117(44):27277-84. doi: 10.1073/pnas.2009609117 [published Online First: 2020/10/14]
31. Vimercati L, Tafuri S, Chironna M, et al. The COVID-19 hotel for healthcare workers: an Italian best practice. *J Hosp Infect* 2020;105(3):387-88. doi: 10.1016/j.jhin.2020.05.018 [published Online First: 2020/05/16]
32. Patel JA, Nielsen FBH, Badiani AA, et al. Poverty, inequality and COVID-19: the forgotten vulnerable. *Public health* 2020;183:110-11. doi: 10.1016/j.puhe.2020.05.006 [published Online First: 2020/05/14]
33. Stanhope J, Weinstein P. Organisational injustice from the COVID-19 pandemic: a hidden burden of disease. *Perspectives in Public Health* 2020;141(1):13-14. doi: 10.1177/1757913920959113
34. Duffy CA, McGoldrick AE. Stress and the bus driver in the UK transport industry. *Work & Stress* 1990;4(1):17-27. doi: 10.1080/02678379008256961
35. Davey JD, Obst PL, Sheehan MC. Demographic and workplace characteristics which add to the prediction of stress and job satisfaction within the police workplace. *Journal of Police and Criminal Psychology* 2001;16(1):29-39. doi: 10.1007/BF02802731
36. Brown JM, Campbell EA. Sources of occupational stress in the police. *Work & Stress* 1990;4(4):305-18. doi: 10.1080/02678379008256993
37. Chaplain RP. Stress and Job Satisfaction: a study of English primary school teachers. *Educational Psychology* 1995;15(4):473-89. doi: 10.1080/0144341950150409



1  
2  
3 38. Mitani S, Fujita M, Nakata K, et al. Impact of post-traumatic stress disorder and job-related stress  
4 on burnout: A study of fire service workers. *The Journal of Emergency Medicine*  
5 2006;31(1):7-11. doi: <https://doi.org/10.1016/j.jemermed.2005.08.008>  
6  
7  
8  
9  
10  
11  
12  
13  
14  
15  
16  
17  
18  
19  
20  
21  
22  
23  
24  
25  
26  
27  
28  
29  
30  
31  
32  
33  
34  
35  
36  
37  
38  
39  
40  
41  
42  
43  
44  
45  
46  
47  
48  
49  
50  
51  
52  
53  
54  
55  
56  
57  
58  
59  
60

For peer review only

## COREQ (CONsolidated criteria for REporting Qualitative research) Checklist

A checklist of items that should be included in reports of qualitative research. You must report the page number in your manuscript where you consider each of the items listed in this checklist. If you have not included this information, either revise your manuscript accordingly before submitting or note N/A.

| Topic                                          | Item No. | Guide Questions/Description                                                                                                                              | Reported on Page No. |
|------------------------------------------------|----------|----------------------------------------------------------------------------------------------------------------------------------------------------------|----------------------|
| <b>Domain 1: Research team and reflexivity</b> |          |                                                                                                                                                          |                      |
| <i>Personal characteristics</i>                |          |                                                                                                                                                          |                      |
| Interviewer/facilitator                        | 1        | Which author/s conducted the interview or focus group?                                                                                                   |                      |
| Credentials                                    | 2        | What were the researcher's credentials? E.g. PhD, MD                                                                                                     |                      |
| Occupation                                     | 3        | What was their occupation at the time of the study?                                                                                                      |                      |
| Gender                                         | 4        | Was the researcher male or female?                                                                                                                       |                      |
| Experience and training                        | 5        | What experience or training did the researcher have?                                                                                                     |                      |
| <i>Relationship with participants</i>          |          |                                                                                                                                                          |                      |
| Relationship established                       | 6        | Was a relationship established prior to study commencement?                                                                                              |                      |
| Participant knowledge of the interviewer       | 7        | What did the participants know about the researcher? e.g. personal goals, reasons for doing the research                                                 |                      |
| Interviewer characteristics                    | 8        | What characteristics were reported about the interviewer/facilitator? e.g. Bias, assumptions, reasons and interests in the research topic                |                      |
| <b>Domain 2: Study design</b>                  |          |                                                                                                                                                          |                      |
| <i>Theoretical framework</i>                   |          |                                                                                                                                                          |                      |
| Methodological orientation and Theory          | 9        | What methodological orientation was stated to underpin the study? e.g. grounded theory, discourse analysis, ethnography, phenomenology, content analysis |                      |
| <i>Participant selection</i>                   |          |                                                                                                                                                          |                      |
| Sampling                                       | 10       | How were participants selected? e.g. purposive, convenience, consecutive, snowball                                                                       |                      |
| Method of approach                             | 11       | How were participants approached? e.g. face-to-face, telephone, mail, email                                                                              |                      |
| Sample size                                    | 12       | How many participants were in the study?                                                                                                                 |                      |
| Non-participation                              | 13       | How many people refused to participate or dropped out? Reasons?                                                                                          |                      |
| <i>Setting</i>                                 |          |                                                                                                                                                          |                      |
| Setting of data collection                     | 14       | Where was the data collected? e.g. home, clinic, workplace                                                                                               |                      |
| Presence of non-participants                   | 15       | Was anyone else present besides the participants and researchers?                                                                                        |                      |
| Description of sample                          | 16       | What are the important characteristics of the sample? e.g. demographic data, date                                                                        |                      |
| <i>Data collection</i>                         |          |                                                                                                                                                          |                      |
| Interview guide                                | 17       | Were questions, prompts, guides provided by the authors? Was it pilot tested?                                                                            |                      |
| Repeat interviews                              | 18       | Were repeat interviews carried out? If yes, how many?                                                                                                    |                      |
| Audio/visual recording                         | 19       | Did the research use audio or visual recording to collect the data?                                                                                      |                      |
| Field notes                                    | 20       | Were field notes made during and/or after the interview or focus group?                                                                                  |                      |
| Duration                                       | 21       | What was the duration of the interviews or focus group?                                                                                                  |                      |
| Data saturation                                | 22       | Was data saturation discussed?                                                                                                                           |                      |
| Transcripts returned                           | 23       | Were transcripts returned to participants for comment and/or                                                                                             |                      |

| Topic                                  | Item No. | Guide Questions/Description                                                                                                        | Reported on Page No. |
|----------------------------------------|----------|------------------------------------------------------------------------------------------------------------------------------------|----------------------|
|                                        |          | correction?                                                                                                                        |                      |
| <b>Domain 3: analysis and findings</b> |          |                                                                                                                                    |                      |
| <i>Data analysis</i>                   |          |                                                                                                                                    |                      |
| Number of data coders                  | 24       | How many data coders coded the data?                                                                                               |                      |
| Description of the coding tree         | 25       | Did authors provide a description of the coding tree?                                                                              |                      |
| Derivation of themes                   | 26       | Were themes identified in advance or derived from the data?                                                                        |                      |
| Software                               | 27       | What software, if applicable, was used to manage the data?                                                                         |                      |
| Participant checking                   | 28       | Did participants provide feedback on the findings?                                                                                 |                      |
| <i>Reporting</i>                       |          |                                                                                                                                    |                      |
| Quotations presented                   | 29       | Were participant quotations presented to illustrate the themes/findings?<br>Was each quotation identified? e.g. participant number |                      |
| Data and findings consistent           | 30       | Was there consistency between the data presented and the findings?                                                                 |                      |
| Clarity of major themes                | 31       | Were major themes clearly presented in the findings?                                                                               |                      |
| Clarity of minor themes                | 32       | Is there a description of diverse cases or discussion of minor themes?                                                             |                      |

Developed from: Tong A, Sainsbury P, Craig J. Consolidated criteria for reporting qualitative research (COREQ): a 32-item checklist for interviews and focus groups. *International Journal for Quality in Health Care*. 2007. Volume 19, Number 6: pp. 349 – 357

**Once you have completed this checklist, please save a copy and upload it as part of your submission. DO NOT include this checklist as part of the main manuscript document. It must be uploaded as a separate file.**

# BMJ Open

**'Stressed, uncomfortable, vulnerable, neglected': a qualitative study of the psychological and social impact of the COVID-19 pandemic on UK frontline keyworkers.**

|                                 |                                                                                                                                                                                                                                                                                                                                                                                                                                                                                                                                                                                           |
|---------------------------------|-------------------------------------------------------------------------------------------------------------------------------------------------------------------------------------------------------------------------------------------------------------------------------------------------------------------------------------------------------------------------------------------------------------------------------------------------------------------------------------------------------------------------------------------------------------------------------------------|
| Journal:                        | <i>BMJ Open</i>                                                                                                                                                                                                                                                                                                                                                                                                                                                                                                                                                                           |
| Manuscript ID                   | bmjopen-2021-050945.R1                                                                                                                                                                                                                                                                                                                                                                                                                                                                                                                                                                    |
| Article Type:                   | Original research                                                                                                                                                                                                                                                                                                                                                                                                                                                                                                                                                                         |
| Date Submitted by the Author:   | 15-Sep-2021                                                                                                                                                                                                                                                                                                                                                                                                                                                                                                                                                                               |
| Complete List of Authors:       | May, Tom; University College London, Research Department of Behavioural Science and Health, Institute of Epidemiology and Health Care<br>Aughterson, Henry; University College London, Research Department of Behavioural Science and Health, Institute of Epidemiology and Health Care<br>Fancourt, Daisy; University College London, Research Department of Behavioural Science and Health, Institute of Epidemiology and Health Care<br>Burton, Alexandra; University College London, Research Department of Behavioural Science and Health, Institute of Epidemiology and Health Care |
| <b>Primary Subject Heading</b>: | Qualitative research                                                                                                                                                                                                                                                                                                                                                                                                                                                                                                                                                                      |
| Secondary Subject Heading:      | Public health                                                                                                                                                                                                                                                                                                                                                                                                                                                                                                                                                                             |
| Keywords:                       | COVID-19, MENTAL HEALTH, OCCUPATIONAL & INDUSTRIAL MEDICINE, QUALITATIVE RESEARCH                                                                                                                                                                                                                                                                                                                                                                                                                                                                                                         |
|                                 |                                                                                                                                                                                                                                                                                                                                                                                                                                                                                                                                                                                           |

SCHOLARONE™  
Manuscripts

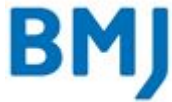

I, the Submitting Author has the right to grant and does grant on behalf of all authors of the Work (as defined in the below author licence), an exclusive licence and/or a non-exclusive licence for contributions from authors who are: i) UK Crown employees; ii) where BMJ has agreed a CC-BY licence shall apply, and/or iii) in accordance with the terms applicable for US Federal Government officers or employees acting as part of their official duties; on a worldwide, perpetual, irrevocable, royalty-free basis to BMJ Publishing Group Ltd ("BMJ") its licensees and where the relevant Journal is co-owned by BMJ to the co-owners of the Journal, to publish the Work in this journal and any other BMJ products and to exploit all rights, as set out in our [licence](#).

The Submitting Author accepts and understands that any supply made under these terms is made by BMJ to the Submitting Author unless you are acting as an employee on behalf of your employer or a postgraduate student of an affiliated institution which is paying any applicable article publishing charge ("APC") for Open Access articles. Where the Submitting Author wishes to make the Work available on an Open Access basis (and intends to pay the relevant APC), the terms of reuse of such Open Access shall be governed by a Creative Commons licence – details of these licences and which [Creative Commons](#) licence will apply to this Work are set out in our licence referred to above.

Other than as permitted in any relevant BMJ Author's Self Archiving Policies, I confirm this Work has not been accepted for publication elsewhere, is not being considered for publication elsewhere and does not duplicate material already published. I confirm all authors consent to publication of this Work and authorise the granting of this licence.

1  
2  
3 **Title:** ‘Stressed, uncomfortable, vulnerable, neglected’: a qualitative study of the  
4 psychological and social impact of the COVID-19 pandemic on UK frontline keyworkers.  
5  
6

7 **Authors:** Tom May<sup>1\*</sup>, Henry Aughterson<sup>1</sup>, Daisy Fancourt<sup>1</sup>, Alexandra Burton<sup>1</sup>  
8  
9

10  
11  
12 <sup>1</sup>Research Department of Behavioural Science and Health  
13

14 Institute of Epidemiology & Health Care  
15

16 University College London  
17

18 1-19 Torrington Place  
19

20 London  
21

22 WC1E 7HB  
23  
24  
25  
26  
27  
28  
29  
30  
31  
32  
33  
34  
35  
36  
37  
38  
39  
40  
41  
42  
43  
44  
45  
46  
47  
48  
49  
50  
51  
52  
53  
54  
55  
56  
57  
58  
59  
60

\* [t.may@ucl.ac.uk](mailto:t.may@ucl.ac.uk) (TM)

## Abstract:

**Objectives** Non-healthcare keyworkers face distinct occupational vulnerabilities that have received little consideration within broader debates about ‘essential’ work and psychological distress during the COVID-19 pandemic. The aim of this study was therefore to explore the impact of the pandemic on the working lives and mental health and wellbeing of non-healthcare keyworkers in the UK.

**Design** In-depth, qualitative interviews, analysed using a reflexive thematic analysis.

**Setting** Telephone or video call interviews, conducted in the UK between September 2020 and January 2021.

**Participants** 23 participants aged 26-61 (mean age =47.2) employed in a range of non-healthcare keyworker occupations, including transport, retail, education, postal services, the police and fire services, waste collection, finance and religious services.

**Results** Keyworkers experienced adverse psychological effects during the COVID-19 pandemic, including fears of COVID-19 exposure, contagion and subsequent transmission to others, especially their families. These concerns were often experienced in the context of multiple exposure risks, including insufficient PPE and a lack of workplace mitigation practices. Keyworkers also described multiple work-related challenges, including increased workload, a lack of public and organisational recognition and feelings of disempowerment.

**Conclusions** In efforts to reduce psychosocial concerns among non-healthcare keyworkers, there is a need for appropriate support during the COVID-19 pandemic and in preparation for other infections (e.g. seasonal influenza) in the future. This includes the provision of psychological and workplace measures attending to the intersections of personal vulnerability and work conditions that cause unique risks and challenges among those in frontline keyworker occupations.

### Strengths and limitations of this study

- This is the first known qualitative study to interview a range of non-healthcare keyworkers about their experiences of working during the COVID-19 pandemic.
- Data were obtained through in-depth, qualitative interviews with a strong theoretical underpinning between September 2020 – January 2021, thereby complementing earlier quantitative research in this field.
- Findings can inform the development of psychosocial and occupational support for non-healthcare keyworkers, both as COVID-19 persists and in future scenarios.
- Study may be limited by a sample biased toward those motivated or willing to participate.
- Data cover a range of keyworker occupations, which, whilst useful in terms of coverage, may limit specificity.



## Introduction

In response to the COVID-19 pandemic, restrictions of varying stringency have been imposed by governments around the world to suppress the virus. In the UK, mitigation measures including self-isolation, mobility constraints and the closure of all but essential workplaces have been implemented in efforts to minimise contact and transmission<sup>1</sup>. Whilst some occupational groups have navigated these measures through flexible working practices (e.g. home working) and economic support (e.g. ‘furlough’), those employed in ‘essential’ keyworker occupations, including healthcare, transport and education among others, were mostly exempt from such strategies<sup>2</sup>. Consequently, many frontline keyworkers have continued to work throughout the pandemic, often at increased risk of exposure to and acquisition of COVID-19<sup>3-5</sup>.

The psychological demands of working through the COVID-19 pandemic have attracted a substantial amount of academic interest. However, to date, research has primarily focused on the experiences of health and social care workers, including ‘frontline’ staff such as nurses, GPs, anaesthetists and care home and social workers<sup>6-12</sup>. These studies have documented elevated levels of stress<sup>11</sup>, anxiety<sup>10</sup> and depression<sup>9</sup> through increased workloads, changing work conditions, and feelings of helplessness<sup>6-12</sup>. Health and social care workers have also endured longer working hours with inadequate personal protective equipment (PPE)<sup>7</sup>, and have reported fears of infection for themselves and their families<sup>8 12</sup>. There is evidence that previous epidemics (e.g., SARS and MERS) posed similar work-related stressors and subsequent demands on the psychological wellbeing of those working in health and social care occupations<sup>13-15</sup>. Conversely, there is some evidence that health and social care workers may also experience positive outcomes from working throughout pandemics, including a renewed sense of purpose, contribution and reward<sup>8 12</sup>.

1  
2  
3  
4  
5 Research investigating the experiences of non-health keyworkers (hereafter ‘keyworkers’)  
6 such as those employed in transport, retail, education and various other public services is  
7 limited<sup>4</sup>. Nevertheless, emerging quantitative data suggest that essential service workers (e.g.  
8 food chain, public security and transport) are experiencing elevated stress and anxiety during  
9 the pandemic<sup>16</sup>. A recent publication on grocery store workers in the United States found  
10 increased anxiety and depression among employees with direct exposure to customers (e.g.  
11 cashiers)<sup>4</sup>. Correspondingly, a case study of a single UK supermarket employee described  
12 how customer behaviours, inadequate PPE and the absence of workplace mitigation policies  
13 induced fears of COVID-19 transmission<sup>5</sup>.  
14  
15  
16  
17  
18  
19  
20  
21  
22  
23  
24  
25  
26  
27  
28

29 Many keyworkers face distinct occupational vulnerabilities that have received little  
30 consideration within broader debates about essential work and psychological distress during  
31 the pandemic. First, there is evidence that some keyworkers (e.g. transport workers) have  
32 increased vulnerability to COVID-19 due to older age, the presence of pre-existing health  
33 conditions, belonging to a Black, Asian or Minority ethnic group and residing in an area  
34 characterised by high levels of socioeconomic deprivation<sup>3</sup>. Being at increased risk of  
35 COVID-19 susceptibility is likely to have a detrimental impact on mental health and  
36 wellbeing due to the perceived negative consequences of infection, as documented in studies  
37 with older adults<sup>17</sup> and those with long-term health conditions<sup>18</sup>. Second, many keyworkers,  
38 particularly those from low-income, service, or elementary occupations, may face financial  
39 challenges that increase susceptibility to COVID-19<sup>2</sup>. For example, although the Coronavirus  
40 Act 2020 extended Statutory Sick Pay (SSP) to all UK employees, the scheme is based on  
41 contractual hours. Part-time employees, or those reliant on overtime, may therefore be  
42 unwilling to take leave or self-isolate due to substantial reductions in wages<sup>2,5</sup>. Alternatively,  
43  
44  
45  
46  
47  
48  
49  
50  
51  
52  
53  
54  
55  
56  
57  
58  
59  
60

1  
2  
3 some keyworkers may face financial hardship if they choose to or are required to self-isolate,  
4  
5 which may induce mental distress<sup>19 20</sup>.  
6  
7  
8  
9

10 To date, a large proportion of research on keyworker mental health has been conducted with  
11  
12 healthcare workers <sup>6-12</sup> or has focused on specific non-healthcare keyworker groups (e.g.  
13  
14 grocery store workers <sup>4 5</sup>). However, given that keyworkers fulfil a variety of roles whereby  
15  
16 their exposure to the public and potential risk of COVID-19 infection differs <sup>2 16</sup>, there is a  
17  
18 need for in-depth qualitative data on a broader range of keyworker experiences and how these  
19  
20 may vary among occupations. This is crucial to aid our understanding of specific work-  
21  
22 related stressors and to inform future psychosocial support for this group as the COVID-19  
23  
24 pandemic persists and in preparation for other infections (e.g. seasonal influenza). To these  
25  
26 ends, the study aimed to explore qualitatively the impact of the COVID-19 pandemic on the  
27  
28 working lives and mental health and wellbeing of UK frontline keyworkers.  
29  
30  
31  
32  
33  
34  
35  
36  
37  
38  
39  
40  
41  
42  
43  
44  
45  
46  
47  
48  
49  
50  
51  
52  
53  
54  
55  
56  
57  
58  
59  
60

## Methods

The research employed a qualitative design using semi-structured interviews with UK keyworkers. The study formed part of the UCL COVID-19 Social Study<sup>21</sup>, which explores the psychosocial effects of COVID-19 and associated restrictions on adults in the UK. Participants were interviewed between July 2020 – January 2021 about their working experiences throughout the pandemic, including any implications for mental health and wellbeing. Ethical approval was provided by University College London research ethics committee [Project ID 14895/005].

## Sample and recruitment

Eligibility was based primarily on whether the person was a non-healthcare keyworker (as defined by UK Government criteria<sup>22</sup>), aged over 18, working during the pandemic, and living in the UK. Participants were purposively recruited to ensure diversity of gender, age, and occupation via social media, personal contacts and the UCL COVID-19 Social Study newsletter and website. Participants were provided with both verbal and written information about the purpose of the research, and informed that their involvement was voluntary. All participants signed a consent form to indicate their agreement to participate, and provided demographic information.

## Data collection

Interviews were conducted by TM (research fellow in social science), RC (research fellow in public health) and SE (research assistant) via telephone or video call. All interviewers were

1  
2  
3 experienced qualitative health researchers educated to at least postgraduate level. Interviews  
4 followed a topic guide that posed questions about the participant's experience(s) of the  
5 impact of the pandemic on work, social life and mental health and wellbeing. Interviews  
6 lasted an average of 45 minutes, and were digitally recorded and transcribed verbatim by a  
7 professional transcription service. Interview topic guide development was guided by existing  
8 theories on behaviour change <sup>23</sup>, social integration and health <sup>24</sup>, and health, stress and coping  
9 <sup>25</sup>. Questions and prompts were designed to illicit responses around (i) changes to work life,  
10 ii) changes to social lives, iii) impact of the pandemic on mental health and iv) worries about  
11 the future. Specific topic guide questions are listed in Figure 1, and the full topic guide is  
12 included in the supplementary material.  
13  
14  
15  
16  
17  
18  
19  
20  
21  
22  
23  
24  
25  
26  
27

28 **\*\*\*Figure 1 about here\*\*\***  
29

30  
31 Participants were offered compensation in the form of a £10 high street e-voucher. Data  
32 collection continued up until the point at which instances of data emerged consistently, or  
33 where no further data would develop new properties, categories or findings (i.e. theoretical  
34 saturation)<sup>26</sup>.  
35  
36  
37  
38  
39  
40  
41  
42

### 43 Patient and Public Involvement

44  
45

46 Participants or members of the public were not involved in the design, conduct or reporting of  
47 the study, nor the dissemination of findings. Participants will be provided with study result  
48 upon request, however. The findings will also be disseminated to the public through social  
49 media and newsletters (e.g., March Network).  
50  
51  
52  
53  
54  
55  
56  
57  
58  
59  
60

## Data analysis

Following anonymisation by the lead researcher (TM), transcripts were uploaded to NVivo version 12 software for analysis. A reflexive thematic approach was adopted in line with the principles of Braun and Clarke<sup>27 28</sup>, which began with researchers familiarising themselves with data by reading through the individual transcripts. Following this, three transcripts were initially read independently by two researchers (TM and HA), who coded and discussed any emerging codes of potential significance to the research objective. A preliminary coding framework, informed deductively by concepts within the topic guide, was used to guide this process, although an inductive approach was also used to refine the framework in correspondence with any emerging concepts within the data. This was then applied to the remaining transcripts by TM, who re-read transcripts and coded and synthesised text into categories, which were subsequently analysed and grouped into themes. To ensure that the final extracted themes were not just the personal interpretation of one team member, the qualitative research team met weekly to discuss and iteratively refine any new codes or themes that emerged.

## Results

Twenty-three keyworkers were interviewed. Participants were aged 26-61, predominantly male (61%) and White British (70%) (see Table 1).

**Table 1: Characteristics of participants**

|                                |                                                                                                                                                                                                                                                                                                                                                                         |
|--------------------------------|-------------------------------------------------------------------------------------------------------------------------------------------------------------------------------------------------------------------------------------------------------------------------------------------------------------------------------------------------------------------------|
| <b>Number of participants</b>  | <b>23</b>                                                                                                                                                                                                                                                                                                                                                               |
| <b>Profession</b>              | Bank worker (1)<br>Bus driver (6)<br>Bus depot supervisor (1)<br>Delivery driver (1)<br>Education staff (deputy head, primary school teacher, teaching assistant) (3)<br>Firefighter (1)<br>Platform staff (1)<br>Police staff (firearms officer, inspector, sergeant) (3)<br>Postal worker (1)<br>Religious staff (2)<br>Supermarket worker (2)<br>Waste operative (1) |
| <b>Age (mean age/range)</b>    | 47.2 (26-61)                                                                                                                                                                                                                                                                                                                                                            |
| <b>Gender</b>                  | Male (14)<br>Female (9)                                                                                                                                                                                                                                                                                                                                                 |
| <b>Ethnicity</b>               | Bangladeshi (1)<br>Black British Caribbean (1)<br>Indian (1)<br>White British (16)<br>White Other (Hungarian, Scottish, Further data not provided) (3)<br>Other (British Turkish) (1)                                                                                                                                                                                   |
| <b>Month/Year of Interview</b> | July 2020 (3)<br>August 2020 (3)<br>September 2020 (9)<br>October 2020 (1)<br>November 2020 (5)<br>January 2021 (2)                                                                                                                                                                                                                                                     |

1  
2  
3  
4  
5  
6  
7  
8  
9  
10 Two primary themes were identified: (1) Perceptions of personal vulnerability and (2) Work-  
11 related challenges. These are shown in Figure 2, along with their respective subthemes.  
12  
13  
14  
15  
16

17 \*\*\*Figure 2 about here\*\*\*  
18  
19

## 20 (1) Perceptions of personal vulnerability 21

### 22 Fears of contracting COVID-19 23 24

25  
26  
27 The majority of participants relayed fears of contracting COVID-19 whilst at work. Some had  
28 underlying health conditions that heightened these anxieties:  
29  
30

31  
32  
33  
34  
35 *'I was probably more worried than some are, that I might be more prone to*  
36 *catching it. Because I've got asthma, I've got chronic sinusitis, and I just*  
37 *thought, if this is a respiratory thing, you're bugged'* (supermarket  
40 *worker 1)*  
41  
42  
43  
44  
45  
46

47 Others were less fearful of the implications for themselves but expressed concerns about  
48 becoming a source of transmission. Some lived in households with vulnerable family  
49 members, including elderly parents and children with underlying health conditions (*'because*  
50 *of my personal circumstances at home, I had two people in their 70s and an asthmatic child.*  
51 *The stress and worry and fear of me basically bringing that home to them was just crippling*  
52 *me'*, supermarket worker 2), whilst others were more concerned about contracting and  
53  
54  
55  
56  
57  
58  
59  
60



1  
2  
3 transmitting the virus to vulnerable members of the public (*'I also don't want to give it to*  
4 *anyone else. I might see someone who's vulnerable, so I'm conscious that it's not me I've got*  
5 *to worry about, it's everyone else', police staff*). Working in environments that posed  
6  
7  
8 significant risks to themselves and others was, therefore, a source of anxiety:  
9  
10  
11

12  
13  
14  
15 *'I was so anxious about going to work with the coronavirus. I was quite*  
16 *paranoid. I used to dread leaving the house every day, going into work. It*  
17 *was really, really hard' (bus driver 1)*  
18  
19  
20  
21  
22  
23  
24  
25

## 26 Exposure risks

27  
28  
29 Participants noted specific exposure risks at work that prompted fears of contracting COVID-  
30  
31 19. Some reported governmental and organisational delays in initiating and implementing  
32  
33 protective actions, including workplace instructions aimed at mitigating transmission. As a  
34  
35 result, many continued to work without organisational guidance during the initial stages of  
36  
37 the pandemic, which prompted feelings of vulnerability:  
38  
39  
40  
41  
42  
43

44 *'So, that first week was really important to me, because we weren't really*  
45 *protected. We didn't know what the crack was about face masks....we were*  
46 *driving around in buses for that week that didn't have protection, what we*  
47 *call an assault screen, you know, something that separates you from the*  
48 *passengers on the bus...and we were thinking, jeez guys, anything could be*  
49 *going on here' (bus driver 2)*  
50  
51  
52  
53  
54  
55  
56  
57  
58  
59  
60

1  
2  
3 Similarly, most participants reported the inadequate provision of workplace PPE. Some noted  
4 initial delays in receiving equipment through their employer (*'hand sanitiser came in, I think,*  
5 *probably three, four weeks after lockdown started'*, bus driver 3), whilst others described  
6 limited (*'sometimes we don't even have soap in the bathrooms'*, delivery driver) or no  
7 supplies (*'we weren't given any kind of PPE. Nothing was offered'*, supermarket worker 2).  
8  
9 In some workplaces, such as on buses and in supermarkets, other protective measures  
10 including daily antiviral cleaning and enhanced sanitation were often inadequate:  
11  
12  
13  
14  
15  
16  
17  
18  
19  
20  
21

22  
23 *'There are aspects of it that worry me. I don't think in some ways [the*  
24 *supermarket] is the most hygienic place in the world' (supermarket worker*  
25  
26  
27 *1)*  
28  
29  
30  
31

32 Working closely with the public was an additional concern among some keyworkers. Some  
33 noted how some members of the public did not always conform with social distancing  
34 guidelines or the wearing of PPE (*'there are people not getting on with masks when they*  
35 *should, or if they are wearing one they are wearing one under their chin. I would say 80% of*  
36 *people are being compliant, but then you've got 20% of people who don't give a monkeys'*,  
37 *bus driver 4*). Others reported how the public would also, at times, behave inappropriately  
38 around staff. This was often frightening for participants:  
39  
40  
41  
42  
43  
44  
45  
46  
47  
48  
49  
50

51 *'I mean, we did initially have some young lads come in who were actually*  
52 *deliberately coughing and sneezing, both on colleagues and other*  
53 *customers. And it really freaked a lot of people out because people were*  
54 *genuinely in fear' (supermarket worker 2)*  
55  
56  
57  
58  
59  
60

1  
2  
3  
4  
5  
6 Relatedly, some keyworkers worked in confined spaces that were uncondusive to social  
7 distancing (*'social distance is quite hard at the depot to do', delivery driver*), or worked with  
8 colleagues who did not follow social distancing rules. The inability to properly socially  
9 distance elevated fears of potential exposure:  
10  
11  
12  
13  
14  
15  
16  
17

18 *'I don't feel very safe...because many, many drivers arrive and they meet*  
19 *with other people as well and I don't know where they are or who they are*  
20 *...a few of them was coughing...and they said, oh it's just a cold. But you*  
21 *think it's a cold but how I supposed to know that it's not' (delivery driver)*  
22  
23  
24  
25  
26  
27  
28  
29

### 30 Virus mitigation strategies

31  
32  
33  
34  
35 To mitigate concerns about contracting and transmitting the virus, participants often enacted  
36 their own mitigation strategies. Some reported purchasing and wearing their own PPE (*'I got*  
37 *my face mask, I got a cloth one...I have started wearing a hoodie as well, just to cover me*  
38 *whole', bus driver 6*) and sanitising their workspace (*'I took my own bleach solution and*  
39 *soapy water solution and was cleaning everything in the cab...we were all bringing our own*  
40 *stuff in...just to be safe', bus driver 4*). Such measures were acted out in the absence of  
41  
42  
43  
44  
45  
46  
47  
48  
49 inadequate PPE provision:  
50  
51  
52  
53

54 *'There was no hand sanitisers. There was nothing. Absolutely zero. Even*  
55 *during lockdown, for the first part of it, there was nothing at all. It was*  
56  
57  
58  
59 *down to the drivers' (bus driver 4)*  
60

1  
2  
3  
4  
5  
6 Whilst these measures enabled participants to psychologically cope with stressful working  
7  
8 conditions, they did not always prevent family members or loved ones from feeling anxious  
9  
10 about possible transmission. To reduce these concerns, some keyworkers would therefore  
11  
12 ‘decontaminate’ upon re-entering their home:  
13  
14

15  
16  
17  
18 *‘So when I come from school, I literally strip off at the door. Everything*  
19  
20 *goes into a bag, everything gets cleaned off. I don’t talk to anyone or touch*  
21  
22 *anyone. I don’t go near anyone until I’ve decontaminated’ (teacher 1).*  
23  
24

25  
26  
27  
28 Others temporarily separated from anxious loved ones by either sleeping in separate  
29  
30 bedrooms (*‘[husband] went in the spare room, so he kind of lived in the spare room for a*  
31  
32 *long time, so that we were distanced’, supermarket worker 1)* or moving out of their home.  
33  
34 One bus driver, for example, moved to rented accommodation to protect his wife from the  
35  
36 risk of infection. Such measures, whilst deemed necessary by participants, induced additional  
37  
38 psychosocial strains including loneliness and isolation:  
39  
40

41  
42  
43  
44  
45 *‘[I feel] Very lonely...I’ve been with [wife] since 1990. We’ve always been*  
46  
47 *together, always done things together and to suddenly be sitting in a room*  
48  
49 *on your own is quite dire. It upset me at first. I cried myself to sleep for a*  
50  
51 *few nights, you can’t believe this is happening’ (bus driver 4)*  
52  
53

## 54 55 56 57 (2) Work-related challenges 58 59 60

### Increased workload burdens

The pandemic presented several work-related disruptions and challenges. Staff who were infected with COVID-19 or had been in close contact with a case were required to self-isolate. This often resulted in staff shortages:

*'During lockdown, we were decimated with staff. We were absolutely on our backside...so, I was actually out on weekends, on Saturdays, driving vehicles supporting the operation leaders. We didn't have enough staff'*  
(waste operative)

Insufficient staff numbers resulted in increased workloads and longer hours, often without extra pay ('we're doing more hours. They increased the length of the shift. We're on a salary. We're not hourly-paid so obviously, when we were due to do a shorter shift we would still get a long one', bus driver 4). Some participants were also required to perform additional or new duties to relieve workload burdens, which were an additional source of stress:

*'We're totally doing jobs that we never did before, because we're answering the telephone calls, because our call centre is in India, and they're on total lockdown...so, that part I find stressful'* (bank worker)

The stress of increased workload burdens and carrying out new tasks beyond usual levels of expertise would, at times, lead to tension and conflict within the workplace:

1  
2  
3 *'A lot of friction, people just snapping at each other over the slightest*  
4 *thing. It would just set people off. A couple of times, I had to intervene.*  
5  
6 *Guys, calm down. Jesus, boys. What are you doing?...behave yourself...I*  
7  
8 *was having to stop people pulling lumps out of each other' (waste*  
9  
10 *operative)*  
11  
12  
13  
14  
15  
16  
17

18 Additionally, those who transitioned to online working (including police, teachers and bank  
19 workers) welcomed such changes, but noted difficulties. Tasks that were previously  
20 performed with ease proved more challenging when working from home (e.g. communicating  
21 with colleagues). Some also reported being 'overloaded' with virtual meetings:  
22  
23  
24  
25  
26  
27  
28  
29

30 *'Because it's virtual and I chaired a meeting the other day and I said, look,*  
31 *I need to eat, I need to get up. Because what you don't see is, we have a*  
32 *meeting here now, and then say yes, bye, and then I'm straight into another*  
33 *one...so I think there's been a huge overload' (police staff 2)*  
34  
35  
36  
37  
38  
39  
40  
41  
42  
43  
44

#### 45 Lack of recognition and support

46  
47  
48

49 Although some participants were appreciative of the support they received from the public,  
50 some felt undervalued, particularly in comparison to NHS health care workers whose work  
51 was recognised regularly in public gestures of appreciation (e.g., clap for carers):  
52  
53  
54  
55  
56  
57  
58  
59  
60

1  
2  
3 *'They deserve the respect they get, the NHS people, and they should. But I*  
4 *think a lot of people forgot about there's people out there like myself on the*  
5 *railway, bus drivers as well. And there's been really, not much for people,*  
6 *like myself, in the frontline' (platform staff)*  
7  
8  
9  
10  
11  
12  
13  
14

15 Internal recognition (i.e. from management) was also limited (*'Internally, from*  
16 *management...I don't think the recognition has been as wide as it could or should be', waste*  
17 *operative*). In particular, keyworkers felt that the risks they were exposed to were not fully  
18 acknowledged or appreciated (*'I felt stressed. I felt uncomfortable. I felt vulnerable. I felt*  
19 *neglected. I felt everything because the company still don't think it's serious', bus driver 5*).

20  
21  
22  
23  
24  
25  
26  
27 Some felt that profit was sometimes prioritised over staff safety:

28  
29  
30  
31  
32 *"Management don't give a crap about staff. They just care about the things*  
33 *that goes in the till, which is the money. And they don't want to pay sick*  
34 *pay. There was another one...his wife was a teacher and she was told to*  
35 *self-isolate. So obviously, he should have been self-isolating, because there*  
36 *was an outbreak at the school. He was told by the manager of the store just*  
37 *to come in, it wasn't a problem"* (supermarket worker 2)  
38  
39  
40  
41  
42  
43  
44  
45  
46

## 47 Disempowerment

48  
49  
50 Despite concerns about contracting COVID-19, many participants felt that they had to work  
51 for fear of financial implications or punitive measures. Some were concerned that protracted  
52 absences would result in disciplinary action (*'But the particular academy chain that I work*  
53 *for has said that if teachers are not available to work from day one when they come back,*  
54 *then it will be disciplinary', teacher 1*) or job loss:  
55  
56  
57  
58  
59  
60

1  
2  
3  
4  
5  
6  
7  
8  
9  
10  
11  
12  
13  
14  
15  
16  
17  
18  
19  
20  
21  
22  
23  
24  
25  
26  
27  
28  
29  
30  
31  
32  
33  
34  
35  
36  
37  
38  
39  
40  
41  
42  
43  
44  
45  
46  
47  
48  
49  
50  
51  
52  
53  
54  
55  
56  
57  
58  
59  
60

*'People were genuinely scared because the government was saying this and your manager's going, no, you do this or you don't have a job...you can't afford not to be there or to lose hours or to lose your job' (supermarket worker 2)*

Participants reported opportunities to take furlough or sick leave but noted the financial implications of doing so. For example, some participants (particularly supermarket workers, bus drivers and police staff) relied on overtime to supplement their income. However, additional hours are not accounted for in SSP or furlough schemes. Any absence would subsequently result in financial hardship:

*'I worked all the way through since the beginning. I was given the choice of furlough, but I turned it down...it would have been such a drop in money, it would have put a financial hardship on us' (bus depot supervisor)*

In this context, many keyworkers recognised that they had no option but to continue working (*'I just thought, well, I either stay at home and do nothing and go unemployed, or I carry on working. And that was literally my two options. There was no middle', bus driver 3*). Some reported feeling powerless, and resigned themselves to the possibility of contracting COVID-19:



1  
2  
3 *'And in my line of work, being on the frontline, there's probably a high*  
4 *chance that I am going to probably get it at some point. And you just resign*  
5  
6 *yourself to the fact' (platform staff)*  
7  
8  
9  
10  
11  
12  
13  
14  
15  
16  
17  
18  
19  
20  
21  
22  
23  
24  
25  
26  
27  
28  
29  
30  
31  
32  
33  
34  
35  
36  
37  
38  
39  
40  
41  
42  
43  
44  
45  
46  
47  
48  
49  
50  
51  
52  
53  
54  
55  
56  
57  
58  
59  
60

For peer review only

## Discussion

The findings presented in this paper are particularly valuable as, to date, non-healthcare keyworker voices are largely absent within broader debates about ‘essential’ work and psychological distress during the COVID-19 pandemic<sup>4</sup>. Therefore, this study provides new insights into the psychological impact of frontline work during the COVID-19 pandemic, including how non-healthcare keyworkers respond to and experience previously identified occupational risks, including insufficient PPE<sup>2</sup> and the inability to socially distance<sup>4</sup>.

By far the most prevalent stressor was the fear of contracting COVID-19. Those who continued to work close to others or in environments un conducive to social distancing reported feelings of exposure and vulnerability. Consistent with research with health and care workers, feeling unsafe and vulnerable to infection are predictive of poor mental health<sup>9 29</sup>. Frontline health and social care workers, for example, were more likely to experience greater psychosocial distress during the COVID-19 pandemic and previous outbreaks because they were likely to have the most direct patient contact<sup>12 29 30</sup>. This is not dissimilar from recent data documenting elevated psychological distress among supermarket workers unable to socially distance at work during the COVID-19 pandemic<sup>4 5</sup>. Although it appears a similar awareness of one’s vulnerability increased feelings of anxiety among our sample, our findings highlight additional occupational factors and working conditions that compounded fears of contagion, including the inadequate provision of PPE and organisational delays in initiating and implementing protective actions aimed at mitigating transmission.

In response to these risks, many participants enacted their own risk reduction practices, including purchasing PPE, sanitising their workplaces and temporary separation from family members. Whilst such measures helped reduce feelings of exposure, they also reinforce

1  
2  
3 widespread concerns from keyworkers and public health officials regarding the inadequacy of  
4 PPE provision for those in frontline occupations during the pandemic<sup>231</sup>. This is potentially  
5 concerning for the wellbeing of keyworkers, given that previous research has highlighted  
6 how precautionary workplace measures, including sufficient PPE and infection control  
7 measures, are associated with decreased levels of concern and emotional exhaustion among  
8 health care workers<sup>29 32</sup>. The provision of protective measures by employers is also likely to  
9 reduce the need to enact mitigation strategies (e.g. temporary separation) that may trigger  
10 additional psychosocial burdens (e.g. loneliness, isolation<sup>10</sup>).  
11  
12  
13  
14  
15  
16  
17  
18  
19  
20  
21  
22  
23

24 Workplace challenges also posed several additional stressors. Increased workloads were  
25 common and led to elevated feelings of stress and subsequent workplace tension and conflict.  
26 Some participants also reported limited internal recognition for their work and felt that the  
27 risks they were exposed to were not fully acknowledged by senior staff. Although workplace  
28 unity has been found to be an important source of support and resilience among health and  
29 social care workers during the COVID-19<sup>10 12</sup> and previous pandemics<sup>15 33</sup>, this protective  
30 factor was therefore not experienced by keyworkers in our study. Similarly, whilst health  
31 and social care workers may experience comparable workload challenges, these are often  
32 endured alongside enhanced public and organisational recognition for their efforts (e.g. clap  
33 for carers). Among health and social care workers, greater recognition - both publicly and  
34 organisationally - has been shown to produce protective mechanisms linked to resilience,  
35 including a renewed sense of purpose, contribution and reward<sup>8 12</sup>. The absence of similar  
36 public and organisational appreciation limited the emergence of any 'positive' psychosocial  
37 effects occurring among those in our study. Hence, many keyworkers experienced workplace  
38 challenges in the absence of protective and support mechanisms proven beneficial to other  
39 occupational groups<sup>16</sup>.  
40  
41  
42  
43  
44  
45  
46  
47  
48  
49  
50  
51  
52  
53  
54  
55  
56  
57  
58  
59  
60

1  
2  
3  
4  
5 Many participants reported feeling powerless to the situation. This was primarily due to fears  
6 of financial hardship or disciplinary action. Indeed, there is evidence that some keyworkers,  
7 particularly those part-time or heavily reliant on overtime, may be unwilling to take leave or  
8 self-isolate due to substantial reductions in wages<sup>5</sup>. Many participants reported similar  
9 concerns and that they had no option but to continue working, despite concerns about  
10 possible infection. Conversely, those who did take leave, whether through SSP or furlough,  
11 reported income losses. This is a particular concern given how COVID-19 induced economic  
12 hardship is having adverse effects on the psychological wellbeing of the population<sup>34-37</sup>.  
13  
14

15  
16  
17  
18  
19  
20  
21  
22  
23  
24  
25 These findings should be considered in light of a number of limitations. First, while this study  
26 provides unique and important insights into keyworkers' experiences during the pandemic,  
27 the timing of the interviews may need to be considered when interpreting the findings. The  
28 majority of interviews were conducted between September and November 2020. Whilst this  
29 meant that participants were able to recount both current and retrospective experiences during  
30 periods of lockdown and more relaxed measures, as the pandemic is ongoing, experiences are  
31 still evolving. Second, this study may be limited by a sample biased toward those motivated  
32 and willing to participate. There is the potential that the views and experiences of those  
33 unable or unwilling to participate may differ from those in this study (e.g. unaffected by  
34 working conditions) and have therefore not been documented. Finally, our data cover a range  
35 of keyworker occupations, which, whilst useful in terms of coverage, may limit specificity.  
36  
37  
38  
39  
40  
41  
42  
43  
44  
45  
46  
47  
48

49  
50 Where possible, we have attempted to draw out any distinctions between occupations in the  
51 reporting of our results.  
52  
53  
54

55  
56  
57 Our study has some important implications for policy and organisational practices. First, our  
58 findings suggest that sufficient protective measures in workplaces are urgently required, as  
59  
60

1  
2  
3 many participants reported feeling exposed and unsafe. The inadequacy of governmental and  
4 organisational responses to the pandemic is highlighted by the fact that some enacted their  
5 own mitigation practices to prevent exposure to and acquisition of COVID-19. Hence, the  
6 provision of adequate PPE, strategies aimed at reducing interpersonal contact (including  
7 temporary accommodation, as has been provided for some health care workers<sup>38</sup>), and repeat  
8 and routine employee testing are but a number of measures that should be pursued to  
9 safeguard keyworkers who continue to operate on the frontline<sup>2</sup>. For keyworkers who are  
10 most at risk, an increased range of actions is needed to protect them from exposure, given that  
11 the most vulnerable workers (whether due to underlying condition, age, ethnicity or financial  
12 situation) reported the greatest concerns regarding work-related stressors. Second, adequate  
13 and accessible financial support must be provided to safeguard keyworkers' health during this  
14 pandemic and beyond. This is especially important for those keyworkers, who, due to the  
15 nature of their job, are unable to access furlough schemes or sick pay because of worries  
16 about financial loss<sup>39 40</sup>. Third, learning from the experiences of keyworkers in other  
17 occupations (e.g. health and social care workers) may assist with planning interventions  
18 designed to assist resilience in pandemics. Some health and social care workers have noted  
19 the importance of public recognition and social support in minimising the psychological  
20 impact of the COVID-19 pandemic<sup>12</sup> and other infectious disease outbreaks<sup>29</sup>. Our data  
21 suggest a need to provide similar recognition for those working in occupations detailed in this  
22 study to buffer negative psychological consequences. Finally, while these measures may help  
23 mitigate the immediate psychological effects of the pandemic, it is worth noting that previous  
24 research conducted before the pandemic has identified similar psychological demands among  
25 keyworkers to those highlighted in this article , including occupational stress<sup>41-43</sup>, low levels  
26 of job satisfaction<sup>42 44</sup> and burnout<sup>45</sup>. Hence, although support for keyworkers is needed now  
27  
28  
29  
30  
31  
32  
33  
34  
35  
36  
37  
38  
39  
40  
41  
42  
43  
44  
45  
46  
47  
48  
49  
50  
51  
52  
53  
54  
55  
56  
57  
58  
59  
60

1  
2  
3 more than ever, workplace support packages must be provided beyond this period to address  
4  
5 long-standing problems for those employed in keyworker occupations.  
6  
7  
8  
9  
10  
11  
12  
13  
14  
15  
16  
17  
18  
19  
20  
21  
22  
23  
24  
25  
26  
27  
28  
29  
30  
31  
32  
33  
34  
35  
36  
37  
38  
39  
40  
41  
42  
43  
44  
45  
46  
47  
48  
49  
50  
51  
52  
53  
54  
55  
56  
57  
58  
59  
60

For peer review only

## Conclusion

This study highlights the psychological impact of the COVID-19 pandemic on those employed in frontline keyworker occupations in the UK. Participants reported anxiety about COVID-19 exposure and transmission to others, especially their families. These fears were often endured in the context of multiple exposure risks, including insufficient PPE and workplace support. Keyworkers also experienced work-related challenges, including increased workloads, a lack of recognition, and a sense of helplessness. This study therefore contributes to understandings of how the intersections of personal vulnerability and work conditions produce unique risks and challenges among those in frontline occupations. It is hoped that by recognising the voices of those who do not feel adequately supported, protected or valued for their work may be an initial step in understanding the psychosocial and occupational support non-healthcare keyworkers need, both as COVID-19 persists and in similar future scenarios.

## Word count

4712

## Acknowledgements

The authors would like to thank Dr Rana Conway and Sara Esser for their help with interviewing participants as part of this study, and Joanna Dawes, Dr Alison McKinlay, Dr Anna Roberts and Katey Warran for their assistance during the recruitment and analysis stages of this paper. The authors would also like to thank those people who gave up their time to take part and contribute to the study.

## Contributors

DF conceived the initial study and DF and AB contributed to the study design and ethical approval process. TM was responsible for data collection and was assisted by RC and SE during this stage. TM conducted formal analysis alongside HA, who coded three transcripts for cross-checking purposes. TM produced the original draft of the manuscript, which HA, AB and DF critically reviewed and edited. All authors (TM, HA, DF, AB) approved the final manuscript for submission.

## Ethical Approval

The study was reviewed and approved by the UCL Ethics Committee (Project ID 14895/005).

## Competing Interests

The author(s) declare no potential conflicts of interest with respect to the research, authorship and/or publication of this article.



### Funding statement

This COVID-19 Social Study was funded by the Nuffield Foundation [WEL/FR-000022583], but the views expressed here are those of the authors. The study was also supported by the MARCH Mental Health Network funded by the Cross-Disciplinary Mental Health Network Plus initiative supported by UK Research and Innovation [ES/S002588/1], and by the Wellcome Trust [221400/Z/20/Z]. DF was funded by the Wellcome Trust [205407/Z/16/Z].

### Data availability statement

The data are not publicly available due to their containing information that could compromise the privacy of research participants.

1  
2  
3 **Figure 1. Examples of questions in the topic guide**  
4

5 **Figure 2. Key themes**  
6  
7  
8  
9  
10  
11  
12  
13  
14  
15  
16  
17  
18  
19  
20  
21  
22  
23  
24  
25  
26  
27  
28  
29  
30  
31  
32  
33  
34  
35  
36  
37  
38  
39  
40  
41  
42  
43  
44  
45  
46  
47  
48  
49  
50  
51  
52  
53  
54  
55  
56  
57  
58  
59  
60

For peer review only

## References

1. Iacobucci G. Covid-19: UK lockdown is “crucial” to saving lives, say doctors and scientists. *BMJ* 2020;368:m1204. doi: 10.1136/bmj.m1204
2. The Lancet. The plight of essential workers during the COVID-19 pandemic. *The Lancet* 2020;395(10237):1587. doi: 10.1016/S0140-6736(20)31200-9
3. Goldblatt P, Morrison J. Initial assessment of London bus driver mortality from COVID-19. London: UCL Institute of Health Equity, 2020.
4. Lan F-Y, Suharlim C, Kales SN, et al. Association between SARS-CoV-2 infection, exposure risk and mental health among a cohort of essential retail workers in the USA. *Occupational and Environmental Medicine* 2020:oemed-2020-106774. doi: 10.1136/oemed-2020-106774
5. Cai M, Velu J, Tindal S, et al. ‘It’s Like a War Zone’: Jay’s Liminal Experience of Normal and Extreme Work in a UK Supermarket during the COVID-19 Pandemic. *Work, Employment and Society* 2020:0950017020966527. doi: 10.1177/0950017020966527
6. Vera San Juan N, Aceituno D, Djellouli N, et al. Mental health and well-being of healthcare workers during the COVID-19 pandemic in the UK: contrasting guidelines with experiences in practice. *BJPsych Open* 2021;7(1):e15. doi: 10.1192/bjo.2020.148 [published Online First: 2020/12/10]
7. Vindrola-Padros C, Andrews L, Dowrick A, et al. Perceptions and experiences of healthcare workers during the COVID-19 pandemic in the UK. *BMJ Open* 2020;10(11):e040503. doi: 10.1136/bmjopen-2020-040503
8. Liu Q, Luo D, Haase JE, et al. The experiences of health-care providers during the COVID-19 crisis in China: a qualitative study. *The Lancet Global Health* 2020;8(6):e790-e98. doi: 10.1016/S2214-109X(20)30204-7
9. Lai J, Ma S, Wang Y, et al. Factors Associated With Mental Health Outcomes Among Health Care Workers Exposed to Coronavirus Disease 2019. *JAMA Network Open* 2020;3(3):e203976-e76. doi: 10.1001/jamanetworkopen.2020.3976
10. Sun N, Wei L, Shi S, et al. A qualitative study on the psychological experience of caregivers of COVID-19 patients. *Am J Infect Control* 2020;48(6):592-98. doi: 10.1016/j.ajic.2020.03.018 [published Online First: 2020/04/08]
11. Kang L, Li Y, Hu S, et al. The mental health of medical workers in Wuhan, China dealing with the 2019 novel coronavirus. *Lancet Psychiatry* 2020;7(3):e14. doi: 10.1016/s2215-0366(20)30047-x [published Online First: 2020/02/09]
12. Aughterson H, McKinlay AR, Fancourt D, et al. Psychosocial impact on frontline health and social care professionals in the UK during the COVID-19 pandemic: a qualitative interview study. *BMJ Open* 2021;11(2):e047353. doi: 10.1136/bmjopen-2020-047353
13. McAlonan GM, Lee AM, Cheung V, et al. Immediate and sustained psychological impact of an emerging infectious disease outbreak on health care workers. *Can J Psychiatry* 2007;52(4):241-7. doi: 10.1177/070674370705200406 [published Online First: 2007/05/16]
14. Lee S-H, Juang Y-Y, Su Y-J, et al. Facing SARS: psychological impacts on SARS team nurses and psychiatric services in a Taiwan general hospital. *Gen Hosp Psychiatry* 2005;27(5):352-58. doi: 10.1016/j.genhosppsy.2005.04.007
15. Kim Y. Nurses' experiences of care for patients with Middle East respiratory syndrome-coronavirus in South Korea. *Am J Infect Control* 2018;46(7):781-87. doi: 10.1016/j.ajic.2018.01.012 [published Online First: 2018/03/01]
16. Paul E, Mak HW, Fancourt D, et al. Comparing mental health trajectories of four different types of key workers with non-key workers: A 12-month follow-up observational study of 21,874 adults in England during the COVID-19 pandemic. *medRxiv* 2021:2021.04.20.21255817. doi: 10.1101/2021.04.20.21255817

17. McKinlay A, Fancourt D, Burton A. "It makes you realise your own mortality." A qualitative study on mental health of older adults in the UK during COVID-19. *medRxiv* 2020:2020.12.15.20248238. doi: 10.1101/2020.12.15.20248238
18. Fisher A, Roberts A, McKinlay AR, et al. The impact of the COVID-19 pandemic on mental health and well-being of people living with a long-term physical health condition: a qualitative study. *medRxiv* 2020:2020.12.03.20243246. doi: 10.1101/2020.12.03.20243246
19. Marmot M. Social determinants of health inequalities. *The Lancet* 2005;365(9464):1099-104. doi: 10.1016/S0140-6736(05)71146-6
20. Marmot M, Allen J, Bell R, et al. WHO European review of social determinants of health and the health divide. *The Lancet* 2012;380(9846):1011-29. doi: 10.1016/S0140-6736(12)61228-8
21. UCL. UCL Covid-19 Social Study 2021 [cited 2021 10th February]. Available from: <https://www.covidsocialstudy.org/> accessed 10th February 2021.
22. UK Government. Children of critical workers and vulnerable children who can access schools or educational settings London: Uk Government; 2021 [Available from: <https://www.gov.uk/government/publications/coronavirus-covid-19-maintaining-educational-provision/guidance-for-schools-colleges-and-local-authorities-on-maintaining-educational-provision> accessed 30th January 2021.
23. Michie S, van Stralen MM, West R. The behaviour change wheel: A new method for characterising and designing behaviour change interventions. *Implementation Science* 2011;6(1):42. doi: 10.1186/1748-5908-6-42
24. Berkman LF, Glass T, Brissette I, et al. From social integration to health: Durkheim in the new millennium. *Social Science & Medicine* 2000;51(6):843-57. doi: [https://doi.org/10.1016/S0277-9536\(00\)00065-4](https://doi.org/10.1016/S0277-9536(00)00065-4)
25. Eriksson. The Sense of Coherence in the Salutogenic Model of Health. In: Mittelmark M. B., Sagy S., Eriksson M, et al., eds. *The Handbook of Salutogenesis*: Springer 2017:91-96.
26. Strauss A. *Qualitative analysis for social scientists*. Cambridge, UK: Cambridge University Press 1999.
27. Braun V, Clarke V. Using thematic analysis in psychology. *Qualitative Research in Psychology* 2006;3(2):77-101. doi: 10.1191/1478088706qp063oa
28. Braun V, Clarke V. *Thematic analysis: APA handbook of research method in psychology*. Washington, DC: APA Books 2012.
29. Brooks SK, Dunn R, Amlôt R, et al. A Systematic, Thematic Review of Social and Occupational Factors Associated With Psychological Outcomes in Healthcare Employees During an Infectious Disease Outbreak. *J Occup Environ Med* 2018;60(3):248-57. doi: 10.1097/jom.0000000000001235 [published Online First: 2017/12/19]
30. Matsuishi K, Kawazoe A, Imai H, et al. Psychological impact of the pandemic (H1N1) 2009 on general hospital workers in Kobe. *Psychiatry Clin Neurosci* 2012;66(4):353-60. doi: 10.1111/j.1440-1819.2012.02336.x [published Online First: 2012/05/26]
31. BBC. Covid: Transport workers call for better protection after rise in deaths 2021 [Available from: <https://www.bbc.co.uk/news/uk-england-london-55623059> accessed 27th January 2021.
32. Marjanovic Z, Greenglass ER, Coffey S. The relevance of psychosocial variables and working conditions in predicting nurses' coping strategies during the SARS crisis: an online questionnaire survey. *Int J Nurs Stud* 2007;44(6):991-8. doi: 10.1016/j.ijnurstu.2006.02.012 [published Online First: 2006/04/19]
33. Tam CW, Pang EP, Lam LC, et al. Severe acute respiratory syndrome (SARS) in Hong Kong in 2003: stress and psychological impact among frontline healthcare workers. *Psychol Med* 2004;34(7):1197-204. doi: 10.1017/s0033291704002247 [published Online First: 2005/02/09]
34. Wright L, Steptoe A, Fancourt D. How are adversities during COVID-19 affecting mental health? Differential associations for worries and experiences and implications for policy. *medRxiv* 2020:2020.05.14.20101717. doi: 10.1101/2020.05.14.20101717

- 1  
2  
3 35. Witteveen D, Velthorst E. Economic hardship and mental health complaints during COVID-19.  
4 *Proc Natl Acad Sci U S A* 2020;117(44):27277-84. doi: 10.1073/pnas.2009609117 [published  
5 Online First: 2020/10/14]  
6  
7 36. Chatterji S, McDougal L, Johns N, et al. COVID-19-Related Financial Hardship, Job Loss, and  
8 Mental Health Symptoms: Findings from a Cross-Sectional Study in a Rural Agrarian  
9 Community in India. *Int J Environ Res Public Health* 2021;18(16) doi:  
10 10.3390/ijerph18168647 [published Online First: 2021/08/28]  
11  
12 37. Posel D, Oyenubi A, Kollamparambil U. Job loss and mental health during the COVID-19  
13 lockdown: Evidence from South Africa. *PLOS ONE* 2021;16(3):e0249352. doi:  
14 10.1371/journal.pone.0249352  
15  
16 38. Vimercati L, Tafuri S, Chironna M, et al. The COVID-19 hotel for healthcare workers: an Italian  
17 best practice. *J Hosp Infect* 2020;105(3):387-88. doi: 10.1016/j.jhin.2020.05.018 [published  
18 Online First: 2020/05/16]  
19  
20 39. Patel JA, Nielsen FBH, Badiani AA, et al. Poverty, inequality and COVID-19: the forgotten  
21 vulnerable. *Public health* 2020;183:110-11. doi: 10.1016/j.puhe.2020.05.006 [published  
22 Online First: 2020/05/14]  
23  
24 40. Stanhope J, Weinstein P. Organisational injustice from the COVID-19 pandemic: a hidden burden  
25 of disease. *Perspectives in Public Health* 2020;141(1):13-14. doi:  
26 10.1177/1757913920959113  
27  
28 41. Duffy CA, McGoldrick AE. Stress and the bus driver in the UK transport industry. *Work & Stress*  
29 1990;4(1):17-27. doi: 10.1080/02678379008256961  
30  
31 42. Davey JD, Obst PL, Sheehan MC. Demographic and workplace characteristics which add to the  
32 prediction of stress and job satisfaction within the police workplace. *Journal of Police and*  
33 *Criminal Psychology* 2001;16(1):29-39. doi: 10.1007/BF02802731  
34  
35 43. Brown JM, Campbell EA. Sources of occupational stress in the police. *Work & Stress*  
36 1990;4(4):305-18. doi: 10.1080/02678379008256993  
37  
38 44. Chaplain RP. Stress and Job Satisfaction: a study of English primary school teachers. *Educational*  
39 *Psychology* 1995;15(4):473-89. doi: 10.1080/0144341950150409  
40  
41 45. Mitani S, Fujita M, Nakata K, et al. Impact of post-traumatic stress disorder and job-related stress  
42 on burnout: A study of fire service workers. *The Journal of Emergency Medicine*  
43 2006;31(1):7-11. doi: <https://doi.org/10.1016/j.jemermed.2005.08.008>  
44  
45  
46  
47  
48  
49  
50  
51  
52  
53  
54  
55  
56  
57  
58  
59  
60

- In what ways has your work life been impacted by the COVID-19 pandemic?
- How do you feel about the changes that have been brought about by Covid-19?  
Have they had any impact on your mental health or wellbeing?
- Have you been doing/ planning anything to help with this?
- Has the pandemic meant that you have any worries for the future?

For peer review only

1  
2  
3  
4  
5  
6  
7  
8  
9  
10  
11  
12  
13  
14  
15  
16  
17  
18  
19  
20  
21  
22  
23  
24  
25  
26  
27  
28  
29  
30  
31  
32  
33  
34  
35  
36  
37  
38  
39  
40  
41  
42  
43  
44  
45  
46  
47  
48  
49  
50  
51  
52  
53  
54  
55  
56  
57  
58  
59  
60

Perceptions of personal vulnerability

- Fears of contracting COVID-19
- Exposure risks
- Virus mitigation strategies

Work-related challenges

- Increased workload burdens
- Lack of recognition and support
- Disempowerment

peer review only

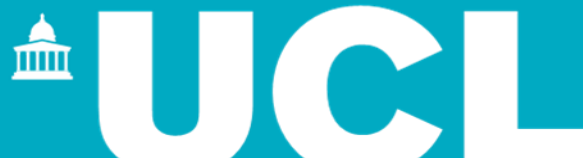

## Draft topic guide: Key Workers

### Ask to describe 'normal life' – before the crisis, and now

- Employed? Type of job, hours etc,
- Full time parent or carer?
- Who you normally live with, does this change, separated/ extended family?
- Whether you would usually have done any type(s) of regular exercise (whatever they perceive as exercise including walking/gardening)

## WORK LIFE

### How would you describe your work life before the Covid-19 pandemic?

Prompts include:

- Describe a typical day?
- Describe your work environment prior to the crisis
- How much autonomy did you have in your role?
- Did you find your job rewarding?
- Did you feel able to do your job to a high standard?
- Did you enjoy your job?
- Describe your sense, if any, of team unity or disunity prior to this crisis?
- How able were you to follow organisational rules and how did you feel about this?
- Normally did you feel safe at work? In what way?

### How would you describe your work life since the Covid-19 pandemic? Please tell us about this

- Describe a typical day now – how have common work practices changed? Have you adapted your work in response to Covid-19 (e.g. delivery, operating hours, change of products/production methods)
- Describe your overall work environment now
- How much autonomy do you feel you have at the moment and how has this changed?
- Are you finding work rewarding at the moment?
- Do you feel able to do your job to a high standard – has this changed since the crisis?
- Enjoyment – do you currently enjoy your job?
- Describe your sense, if any, of team unity or disunity during this crisis?
- How able are you to follow organisational rules and how do you feel about this?
- Do you feel safe? If this has changed, how?

## SOCIAL LIFE

### What was your social life before the Covid-19 pandemic? Has this changed? If so, what has been the impact of Covid-19 on your social life?

- How would you describe your social network before Covid – for example size, types of people, types of relationships, do they live with you, nearby or further away, how often do you see each other, how well do you know each other? How do you interact, face to face, online or social media? Describe some of your common socialising activities. **Has this changed? What has the impact of Covid been on your social network?**
- Can you tell us about any ways your social networks/ friendship groups influence you, such as peer pressure, or encouraging you to get involved in things? Do you compare your life to theirs?



- Could you describe any community participation or volunteering participation before Covid? **Has this changed? If so, what has been the impact of Covid-19 on community participation/volunteering participation?**
- Could you describe the social support you have before Covid? (such as emotional support, advice and information, someone to help you with money or milk/bread/essentials) **Has this changed? If so, what has been the impact of Covid-19 on your social support?**
- **Social engagement (social roles, bonding, attachment) (pre- and post- Covid)**

## MENTAL HEALTH

**How do you feel about the changes that have been brought about by Covid-19?**

**Have they had any impact on your mental health or wellbeing? Please tell us about these**

- What are the things most bothering you at the moment (work or outside of work)?
- What have been the major triggers/causes of any mental health or wellbeing issues?
- How have government guidelines or organisational guidelines impacted your mental health or wellbeing?
- Have you experienced any impact on positive emotions? (prompts: how deeply you can engage with what you are doing, sense of meaning/ purpose, relationships with others, how well you are managing and feelings of control over your situation?)
- Has there been any impact on your sense of identity?
- Have you experienced any negative psychological feelings? (prompts: such as shame, guilt, lack of pleasure, anxiety, worry)
- Please tell us about any physical symptoms due to being stressed or anxious? (prompts: fatigue, sleep problems, pain, illness symptoms, palpitations)

**Have you been doing/ planning anything to help with this?**

- How has your support been, from friends/family? From work colleagues/your organisation?
- Connecting with family or friends online
- Online groups?
- Hobbies/ Reading
- Exercise at home <ask about what they have been doing and if there are specific resources they have found useful to exercise>
- Volunteering
- Other engagement

**Why are you doing/ not doing these things?**

- Helpful/ not helpful – please tell us why
- Enjoyable
- Good for mental health/ wellbeing
- Can't get online, not connected, not comfortable, affordability, confidence in using/ skills
- Skills in using the internet/ communication software
- Living arrangements/ Work/ caring demands
- Peer support/ pressure
- Difficulties/ restriction in physical environment

## PROSPECTION

**Has the pandemic meant that you have any worries for the future?**

- Worries about work/the future of your work?

- 1  
2  
3 • Worries for yourself? Anything not directly connected to work?  
4

5 **How are these different from the worries you had before?**

- 6 • Sense of control/ powerlessness  
7 • Severity of worries / perspective  
8

9 **Will this change the way you live your life in future?**

- 10 • The way you connect with others  
11 • How you look after yourself  
12 • How you support others  
13 • How you exercise?  
14  
15

16 Do you think there will be any changes to the way you work in the future? Why/why not?  
17

18 Has this changed any of your priorities for the future?  
19  
20  
21  
22  
23  
24  
25  
26  
27  
28  
29  
30  
31  
32  
33  
34  
35  
36  
37  
38  
39  
40  
41  
42  
43  
44  
45  
46  
47  
48  
49  
50  
51  
52  
53  
54  
55  
56  
57  
58  
59  
60

## COREQ (CONsolidated criteria for REporting Qualitative research) Checklist

A checklist of items that should be included in reports of qualitative research. You must report the page number in your manuscript where you consider each of the items listed in this checklist. If you have not included this information, either revise your manuscript accordingly before submitting or note N/A.

| Topic                                          | Item No. | Guide Questions/Description                                                                                                                              | Reported on Page No. |
|------------------------------------------------|----------|----------------------------------------------------------------------------------------------------------------------------------------------------------|----------------------|
| <b>Domain 1: Research team and reflexivity</b> |          |                                                                                                                                                          |                      |
| <i>Personal characteristics</i>                |          |                                                                                                                                                          |                      |
| Interviewer/facilitator                        | 1        | Which author/s conducted the interview or focus group?                                                                                                   |                      |
| Credentials                                    | 2        | What were the researcher's credentials? E.g. PhD, MD                                                                                                     |                      |
| Occupation                                     | 3        | What was their occupation at the time of the study?                                                                                                      |                      |
| Gender                                         | 4        | Was the researcher male or female?                                                                                                                       |                      |
| Experience and training                        | 5        | What experience or training did the researcher have?                                                                                                     |                      |
| <i>Relationship with participants</i>          |          |                                                                                                                                                          |                      |
| Relationship established                       | 6        | Was a relationship established prior to study commencement?                                                                                              |                      |
| Participant knowledge of the interviewer       | 7        | What did the participants know about the researcher? e.g. personal goals, reasons for doing the research                                                 |                      |
| Interviewer characteristics                    | 8        | What characteristics were reported about the interviewer/facilitator? e.g. Bias, assumptions, reasons and interests in the research topic                |                      |
| <b>Domain 2: Study design</b>                  |          |                                                                                                                                                          |                      |
| <i>Theoretical framework</i>                   |          |                                                                                                                                                          |                      |
| Methodological orientation and Theory          | 9        | What methodological orientation was stated to underpin the study? e.g. grounded theory, discourse analysis, ethnography, phenomenology, content analysis |                      |
| <i>Participant selection</i>                   |          |                                                                                                                                                          |                      |
| Sampling                                       | 10       | How were participants selected? e.g. purposive, convenience, consecutive, snowball                                                                       |                      |
| Method of approach                             | 11       | How were participants approached? e.g. face-to-face, telephone, mail, email                                                                              |                      |
| Sample size                                    | 12       | How many participants were in the study?                                                                                                                 |                      |
| Non-participation                              | 13       | How many people refused to participate or dropped out? Reasons?                                                                                          |                      |
| <i>Setting</i>                                 |          |                                                                                                                                                          |                      |
| Setting of data collection                     | 14       | Where was the data collected? e.g. home, clinic, workplace                                                                                               |                      |
| Presence of non-participants                   | 15       | Was anyone else present besides the participants and researchers?                                                                                        |                      |
| Description of sample                          | 16       | What are the important characteristics of the sample? e.g. demographic data, date                                                                        |                      |
| <i>Data collection</i>                         |          |                                                                                                                                                          |                      |
| Interview guide                                | 17       | Were questions, prompts, guides provided by the authors? Was it pilot tested?                                                                            |                      |
| Repeat interviews                              | 18       | Were repeat interviews carried out? If yes, how many?                                                                                                    |                      |
| Audio/visual recording                         | 19       | Did the research use audio or visual recording to collect the data?                                                                                      |                      |
| Field notes                                    | 20       | Were field notes made during and/or after the interview or focus group?                                                                                  |                      |
| Duration                                       | 21       | What was the duration of the interviews or focus group?                                                                                                  |                      |
| Data saturation                                | 22       | Was data saturation discussed?                                                                                                                           |                      |
| Transcripts returned                           | 23       | Were transcripts returned to participants for comment and/or                                                                                             |                      |

| Topic                                  | Item No. | Guide Questions/Description                                                                                                        | Reported on Page No. |
|----------------------------------------|----------|------------------------------------------------------------------------------------------------------------------------------------|----------------------|
|                                        |          | correction?                                                                                                                        |                      |
| <b>Domain 3: analysis and findings</b> |          |                                                                                                                                    |                      |
| <i>Data analysis</i>                   |          |                                                                                                                                    |                      |
| Number of data coders                  | 24       | How many data coders coded the data?                                                                                               |                      |
| Description of the coding tree         | 25       | Did authors provide a description of the coding tree?                                                                              |                      |
| Derivation of themes                   | 26       | Were themes identified in advance or derived from the data?                                                                        |                      |
| Software                               | 27       | What software, if applicable, was used to manage the data?                                                                         |                      |
| Participant checking                   | 28       | Did participants provide feedback on the findings?                                                                                 |                      |
| <i>Reporting</i>                       |          |                                                                                                                                    |                      |
| Quotations presented                   | 29       | Were participant quotations presented to illustrate the themes/findings?<br>Was each quotation identified? e.g. participant number |                      |
| Data and findings consistent           | 30       | Was there consistency between the data presented and the findings?                                                                 |                      |
| Clarity of major themes                | 31       | Were major themes clearly presented in the findings?                                                                               |                      |
| Clarity of minor themes                | 32       | Is there a description of diverse cases or discussion of minor themes?                                                             |                      |

Developed from: Tong A, Sainsbury P, Craig J. Consolidated criteria for reporting qualitative research (COREQ): a 32-item checklist for interviews and focus groups. *International Journal for Quality in Health Care*. 2007. Volume 19, Number 6: pp. 349 – 357

**Once you have completed this checklist, please save a copy and upload it as part of your submission. DO NOT include this checklist as part of the main manuscript document. It must be uploaded as a separate file.**
